# Supplementary material
Source: publisher figshare collection journal article supplement (https://gsapubs.figshare.com/articles/dataset/_/12542612)
Supplement: Supplementary file 1 [file 1]

## Sheet: PlotDat9
Source sheet	Sheet1	0.3	530.917	1	531.2	5.94
Plot name	Average8	17.7	530.917	2	530.4	5.98
Plot Type	15			3	526.8	7.66
1st free col	8			4	526.2	5.05
Sigma Level	1			5	532.2	6.33
Absolute Errs	TRUE			6	529.7	7.72
Symbol Type	1			7	530.5	5.91
Inverse Plot	FALSE			8	533.5	8.44
Color Plot	FALSE			9	532.1	5.86
3D plot	FALSE			10	531.7	5.2
Linear	FALSE			11	532.5	5.73
Data Range	P75:Q91			12	533.3	7.94
Filled Symbols	FALSE			13	530.7	5.47
ConcAge	FALSE			14	533.3	7.34
ConcSwap	FALSE			15	532	7.94
1st Symbol-row	1			16	531.4	5.78
				17	531.3	7.11
				IsoLine	IsoLine	IsoLine	IsoLine

## Sheet: PlotDat10
Source sheet	Sheet1	0.68701	0.08588	0.653855	0.0823274	0.670251	0.0840077	0.68681	0.0856906	0.703532	0.087376	0.72042	0.0890642	0.737476	0.0907549	0.639649	0.081	0.641056	0.081	0.63825	0.081	0.636279	0.0806498	0.645532	0.091	0.72193	0.0866386	0.740522	0.0865159	0.727923	0.0861284	0.723018	0.0856951	0.729243	0.0868717	0.748431	0.0866358	0.734527	0.0865286	0.742413	0.0873567	0.738713	0.0867909	0.727122	0.0866376	0.724819	0.0868383	0.742316	0.0872661
Plot name	Concordia9	0.70145	0.08575	0.653799	0.082359	0.670194	0.08404	0.68675	0.0857235	0.703471	0.0874097	0.720358	0.0890984	0.737412	0.0907898	0.639649	0.081	0.642958	0.081197	0.639649	0.0811457	0.652474	0.0823274	0.738928	0.081	0.721587	0.0868137	0.740138	0.0866928	0.727448	0.0863543	0.722765	0.0858439	0.728877	0.0870591	0.747924	0.0868635	0.734187	0.0867037	0.74184	0.0876055	0.738367	0.0869643	0.726831	0.0867917	0.724496	0.0870064	0.741789	0.0875008
Plot Type	1	0.67958	0.08515	0.653636	0.0823881	0.670025	0.0840696	0.686577	0.0857538	0.703293	0.0874405	0.720174	0.0891299	0.737223	0.090822	0.642958	0.0813433	0.646273	0.0815397	0.642958	0.0814896	0.668829	0.0840077			0.72057	0.0869706	0.739001	0.0868514	0.726041	0.0865568	0.722021	0.0859773	0.727795	0.087227	0.746421	0.0870676	0.733181	0.0868607	0.74014	0.0878284	0.737343	0.0871197	0.725971	0.0869298	0.723541	0.0871571	0.740228	0.0877112
1st free col	61	0.69749	0.08505	0.653379	0.0824122	0.66976	0.0840942	0.686304	0.0857789	0.703012	0.0874662	0.719886	0.0891561	0.736926	0.0908486	0.646273	0.0816867	0.649595	0.0818826	0.646273	0.0818337	0.685345	0.0856906			0.7189	0.0871064	0.737133	0.0869885	0.72373	0.0867319	0.720799	0.0860926	0.726017	0.0873722	0.743951	0.0872441	0.73153	0.0869964	0.737347	0.0880212	0.735662	0.0872541	0.724558	0.0870493	0.721972	0.0872874	0.737664	0.0878931
Sigma Level	1	0.69208	0.08606	0.653048	0.0824294	0.66942	0.0841119	0.685954	0.0857969	0.702651	0.0874846	0.719514	0.0891748	0.736545	0.0908677	0.649595	0.0820302	0.652924	0.0822256	0.649595	0.0821778	0.702025	0.087376			0.716609	0.0872182	0.734571	0.0871015	0.720559	0.0868762	0.719124	0.0861877	0.723579	0.0874919	0.740564	0.0873895	0.729265	0.0871082	0.733516	0.0881801	0.733355	0.0873648	0.722619	0.0871477	0.719821	0.0873947	0.734146	0.088043
Absolute Errs	TRUE	0.69677	0.08565	0.652671	0.0824384	0.669031	0.084121	0.685554	0.0858063	0.70224	0.0874941	0.719091	0.0891846	0.736109	0.0908777	0.652924	0.0823738	0.656259	0.0825687	0.652924	0.0825221	0.718871	0.0890642			0.713742	0.087304	0.731364	0.0871882	0.716591	0.0869869	0.717027	0.0862606	0.720529	0.0875837	0.736324	0.0875011	0.72643	0.0871941	0.72872	0.088302	0.730468	0.0874498	0.720194	0.0872232	0.717128	0.0874771	0.729744	0.0881581
Symbol Type	1	0.7	0.08577	0.652277	0.0824384	0.668626	0.084121	0.685137	0.0858063	0.701811	0.0874941	0.71865	0.0891846	0.735656	0.0908777	0.656259	0.0827176	0.659601	0.0829119	0.656259	0.0828665	0.735883	0.0907549			0.710355	0.0873621	0.727575	0.0872469	0.711902	0.0870619	0.71455	0.0863099	0.716924	0.0876459	0.731314	0.0875767	0.723081	0.0872521	0.723054	0.0883845	0.727058	0.0875073	0.717328	0.0872743	0.713946	0.0875329	0.724541	0.088236
Inverse Plot	FALSE	0.68398	0.08628	0.6519	0.0824294	0.668238	0.0841119	0.684737	0.0857969	0.7014	0.0874846	0.718227	0.0891748	0.735221	0.0908677	0.659601	0.0830614	0.66295	0.0832552	0.659601	0.083211	IsoLine	IsoLine			0.706514	0.0873914	0.723277	0.0872765	0.706585	0.0870997	0.711741	0.0863347	0.712836	0.0876772	0.725632	0.0876148	0.719283	0.0872814	0.716627	0.0884261	0.72319	0.0875363	0.714078	0.0873	0.710338	0.0875609	0.718641	0.0882752
Color Plot	TRUE	0.70355	0.08604	0.651569	0.0824122	0.667897	0.0840942	0.684386	0.0857789	0.701039	0.0874662	0.717856	0.0891561	0.734839	0.0908486	0.66295	0.0834054	0.666306	0.0835986	0.66295	0.0835556					0.702293	0.0873912	0.718554	0.0872763	0.700741	0.0870995	0.708655	0.0863345	0.708343	0.087677	0.719387	0.0876146	0.71511	0.0872812	0.709565	0.088426	0.718939	0.0875361	0.710507	0.0872999	0.706373	0.0875608	0.712157	0.088275
3D plot	FALSE	0.69758	0.08597	0.651312	0.0823881	0.667632	0.0840696	0.684114	0.0857538	0.700758	0.0874405	0.717567	0.0891299	0.734542	0.090822	0.666306	0.0837494	0.669669	0.0839421	0.666306	0.0839003					0.697774	0.0873616	0.713499	0.0872465	0.694486	0.0870613	0.705352	0.0863093	0.703535	0.0876453	0.712703	0.0875762	0.710642	0.0872516	0.702004	0.088384	0.71439	0.0875068	0.706684	0.0872738	0.702129	0.0875323	0.705216	0.0882355
Linear	FALSE	0.69202	0.08611	0.651148	0.082359	0.667464	0.08404	0.68394	0.0857235	0.70058	0.0874097	0.717384	0.0890984	0.734354	0.0907898	0.669669	0.0840936	0.673038	0.0842858	0.669669	0.0842451					0.693046	0.0873032	0.708209	0.0871875	0.687941	0.086986	0.701895	0.0862596	0.698503	0.0875828	0.705709	0.0875003	0.705967	0.0871932	0.694093	0.0883011	0.709629	0.087449	0.702684	0.0872224	0.697688	0.0874763	0.697953	0.0881572
Data Range	H75:K91	0.68867	0.08625	0.651092	0.0823274	0.667406	0.0840077	0.683881	0.0856906	0.700519	0.087376	0.717321	0.0890642	0.734289	0.0907549	0.673038	0.0844379	0.676414	0.0846295	0.673038	0.08459					0.6882	0.0872171	0.702788	0.0871006	0.681233	0.0868749	0.698353	0.0861863	0.693346	0.0874907	0.69854	0.0873884	0.701176	0.0871071	0.685985	0.0881789	0.704749	0.0873637	0.698585	0.0871466	0.693137	0.0873936	0.690509	0.0880419
Filled Symbols	FALSE	0.69141	0.08581	0.651148	0.0822958	0.667464	0.0839754	0.68394	0.0856576	0.70058	0.0873424	0.717384	0.0890299	0.734354	0.0907199	0.676414	0.0847823	0.679797	0.0849734	0.676414	0.084935					0.683331	0.0871049	0.69734	0.0869873	0.674493	0.0867303	0.694794	0.086091	0.688165	0.0873707	0.691338	0.0872426	0.696362	0.0869949	0.677838	0.0880197	0.699847	0.0872527	0.694466	0.0870479	0.688564	0.0872859	0.683029	0.0878916
ConcAge	FALSE	0.69462	0.08625	0.651312	0.0822668	0.667632	0.0839458	0.684114	0.0856274	0.700758	0.0873116	0.717567	0.0889984	0.734542	0.0906878	0.679797	0.0851268	0.683186	0.0853173	0.679797	0.0852802					0.678534	0.0869689	0.691973	0.08685	0.667851	0.0865549	0.691287	0.0859753	0.68306	0.0872251	0.68424	0.0870659	0.691619	0.0868589	0.66981	0.0878266	0.695016	0.0871181	0.690408	0.0869282	0.684058	0.0871553	0.67566	0.0877094
ConcSwap	FALSE	0.68947	0.08603	0.651569	0.0822427	0.667897	0.0839212	0.684386	0.0856022	0.701039	0.0872859	0.717856	0.0889722	0.734839	0.0906611	0.683186	0.0854714	0.686583	0.0856614	0.683186	0.0856254					0.673902	0.0868117	0.686789	0.0866912	0.661439	0.0863521	0.687901	0.0858417	0.67813	0.087057	0.677387	0.0868616	0.687039	0.0867017	0.662059	0.0876035	0.690352	0.0869625	0.686489	0.0867899	0.679707	0.0870044	0.668543	0.0874989
1st Symbol-row	1	0.69133	0.08593	0.6519	0.0822254	0.668238	0.0839035	0.684737	0.0855842	0.7014	0.0872675	0.718227	0.0889535	0.735221	0.090642	0.686583	0.0858161	0.689986	0.0860056	0.686583	0.0859708					0.669525	0.0866364	0.681892	0.0865142	0.655379	0.086126	0.684702	0.0856926	0.673472	0.0868694	0.670911	0.0866337	0.682712	0.0865264	0.654734	0.0873545	0.685945	0.0867889	0.682786	0.0866356	0.675596	0.0868361	0.661818	0.0872639
		0.68695	0.08591	0.652277	0.0822164	0.668626	0.0838944	0.685137	0.0855749	0.701811	0.087258	0.71865	0.0889437	0.735656	0.0906321	0.689986	0.0861609	0.693396	0.0863499	0.689986	0.0863163					0.665488	0.0864464	0.677375	0.0863223	0.64979	0.0858808	0.681752	0.0855311	0.669176	0.086666	0.664939	0.0863866	0.678721	0.0863364	0.647978	0.0870847	0.68188	0.0866008	0.679371	0.0864683	0.671805	0.0866537	0.655616	0.0870093
		IsoLine	IsoLine	0.652671	0.0822164	0.669031	0.0838944	0.685554	0.0855749	0.70224	0.087258	0.719091	0.0889437	0.736109	0.0906321	0.693396	0.0865059	0.696814	0.0866943	0.693396	0.0866618					0.661871	0.0862453	0.673326	0.0861192	0.644781	0.0856215	0.679107	0.0853602	0.665326	0.0864509	0.659586	0.0861253	0.675144	0.0861353	0.641923	0.0867992	0.678237	0.0864017	0.676311	0.0862914	0.668407	0.0864606	0.650057	0.0867399
				0.653048	0.0822254	0.66942	0.0839035	0.685954	0.0855842	0.702651	0.0872675	0.719514	0.0889535	0.736545	0.090642	0.696814	0.0868509	0.700238	0.0870388	0.696814	0.0870075					0.658742	0.0860371	0.669825	0.0859089	0.640449	0.0853529	0.676821	0.0851832	0.661997	0.0862281	0.654956	0.0858546	0.672051	0.0859271	0.636687	0.0865036	0.675086	0.0861956	0.673665	0.0861082	0.665468	0.0862608	0.64525	0.0864609
				0.653379	0.0822427	0.66976	0.0839212	0.686304	0.0856022	0.703012	0.0872859	0.719886	0.0889722	0.736926	0.0906611	0.700238	0.0871961	0.703668	0.0873834	0.700238	0.0873533					0.656164	0.0858259	0.66694	0.0856956	0.636879	0.0850804	0.674937	0.0850036	0.659253	0.0860021	0.651141	0.08558	0.669501	0.0857159	0.632371	0.0862037	0.67249	0.0859865	0.671484	0.0859223	0.663047	0.086058	0.641288	0.0861779
				0.653636	0.0822668	0.670025	0.0839458	0.686577	0.0856274	0.703293	0.0873116	0.720174	0.0889984	0.737223	0.0906878	0.703668	0.0875413	0.707106	0.0877281	0.703668	0.0876992					0.654186	0.0856157	0.664726	0.0854833	0.634141	0.0848093	0.673492	0.084825	0.657148	0.0857772	0.648213	0.0853068	0.667546	0.0855057	0.629059	0.0859052	0.670498	0.0857784	0.66981	0.0857373	0.661189	0.0858562	0.638248	0.0858962
				0.653799	0.0822958	0.670194	0.0839754	0.68675	0.0856576	0.703471	0.0873424	0.720358	0.0890299	0.737412	0.0907199	0.707106	0.0878867	0.710551	0.0880729	0.707106	0.0880453					0.652847	0.0854107	0.663227	0.0852762	0.632286	0.0845448	0.672514	0.0846507	0.655723	0.0855578	0.646231	0.0850402	0.666222	0.0853006	0.626817	0.085614	0.66915	0.0855754	0.668678	0.0855569	0.659931	0.0856594	0.63619	0.0856215
				0.653855	0.0823274	0.670251	0.0840077	0.68681	0.0856906	0.703532	0.087376	0.72042	0.0890642	0.737476	0.0907549	0.710551	0.0882322	0.714003	0.0884179	0.710551	0.0883914					0.652173	0.0852148	0.662472	0.0850783	0.631352	0.084292	0.672023	0.0844842	0.655006	0.0853482	0.645233	0.0847855	0.665556	0.0851047	0.625687	0.0853358	0.668471	0.0853815	0.668108	0.0853845	0.659298	0.0854713	0.635153	0.0853589
				ConcTikEll	ConcTikEll	ConcTikEll	ConcTikEll	ConcTikEll	ConcTikEll	ConcTikEll	ConcTikEll	ConcTikEll	ConcTikEll	ConcTikEll	ConcTikEll	0.714003	0.0885778	0.717462	0.0887629	0.714003	0.0887376					0.652177	0.0850318	0.662475	0.0848935	0.631357	0.084056	0.672027	0.0843287	0.65501	0.0851524	0.645237	0.0845477	0.66556	0.0849218	0.625692	0.085076	0.668475	0.0852003	0.668112	0.0852235	0.659302	0.0852957	0.635157	0.0851137
																0.717462	0.0889235	0.720927	0.0891081	0.717462	0.089084					0.652859	0.0848654	0.663238	0.0847254	0.6323	0.0838413	0.672526	0.0841873	0.655736	0.0849743	0.646245	0.0843312	0.666234	0.0847553	0.626831	0.0848396	0.669161	0.0850355	0.668689	0.085077	0.659943	0.0851359	0.636204	0.0848907
																0.720927	0.0892693	0.7244	0.0894534	0.720927	0.0894305					0.654205	0.0847187	0.664744	0.0845772	0.634164	0.083652	0.673512	0.0840626	0.657169	0.0848174	0.648236	0.0841405	0.667566	0.0846086	0.629083	0.0846312	0.670517	0.0848903	0.669828	0.084948	0.661208	0.0849951	0.638271	0.0846941
																0.7244	0.0896152	0.72788	0.0897988	0.7244	0.089777					0.65619	0.0845946	0.666964	0.0844518	0.636912	0.0834919	0.674964	0.0839572	0.659282	0.0846846	0.651171	0.0839791	0.669528	0.0844845	0.632403	0.0844549	0.672516	0.0847674	0.671508	0.0848388	0.663073	0.084876	0.641319	0.0845277
																0.72788	0.0899612	0.731366	0.0901443	0.72788	0.0901237					0.658776	0.0844955	0.669856	0.0843517	0.64049	0.0833641	0.676854	0.083873	0.662033	0.0845786	0.654994	0.0838503	0.672084	0.0843855	0.636727	0.0843142	0.675119	0.0846694	0.673695	0.0847516	0.665501	0.0847808	0.645289	0.0843949
																0.731366	0.0903074	0.73486	0.0904899	0.731366	0.0904705					0.66191	0.0844234	0.673362	0.0842789	0.644829	0.083271	0.679147	0.0838118	0.665369	0.0845014	0.659631	0.0837565	0.675184	0.0843134	0.641971	0.0842117	0.678275	0.0845979	0.676347	0.0846881	0.668445	0.0847116	0.650104	0.0842982
																0.73486	0.0906536	0.738361	0.0908356	0.73486	0.0908174					0.665533	0.0843796	0.677416	0.0842346	0.649844	0.0832145	0.681796	0.0837746	0.669225	0.0844546	0.66499	0.0836995	0.678766	0.0842696	0.648032	0.0841495	0.681923	0.0845546	0.679413	0.0846496	0.671849	0.0846696	0.655669	0.0842395
																0.738361	0.091	0.740029	0.091	0.736702	0.091					0.669574	0.084365	0.681937	0.0842199	0.655438	0.0831957	0.684751	0.0837623	0.673525	0.084439	0.670968	0.0836805	0.682762	0.084255	0.654793	0.0841287	0.685993	0.0845402	0.682831	0.0846368	0.675644	0.0846556	0.661876	0.0842199
																0.738361	0.091	ConcBand	ConcBand	ConcBand	ConcBand					0.673955	0.0843799	0.686838	0.0842349	0.661502	0.0832149	0.687953	0.083775	0.678187	0.0844549	0.677448	0.0836999	0.687093	0.0842699	0.662122	0.0841498	0.690403	0.0845549	0.686537	0.08465	0.679759	0.0846699	0.668605	0.0842399
																IsoLine	IsoLine									0.67859	0.084424	0.692023	0.0842794	0.667918	0.0832718	0.691342	0.0838125	0.683119	0.0845021	0.684304	0.0837572	0.691675	0.0843141	0.669877	0.0842124	0.69507	0.0845986	0.690458	0.0846888	0.684112	0.0847123	0.675724	0.0842989
																										0.683388	0.0844965	0.697392	0.0843526	0.674561	0.0833652	0.69485	0.0838742	0.688226	0.0845797	0.691402	0.0838513	0.69642	0.0843865	0.677906	0.0843152	0.699902	0.0846703	0.694518	0.0847526	0.688619	0.0847819	0.683096	0.0843959
																										0.688257	0.0845959	0.70284	0.0844529	0.681301	0.0834934	0.698409	0.0839587	0.693408	0.084686	0.698605	0.0839804	0.701234	0.0844859	0.686054	0.0844563	0.704805	0.0847687	0.698637	0.08484	0.693193	0.0848773	0.690575	0.0845291
																										0.693102	0.0847202	0.70826	0.0845785	0.688008	0.0836538	0.701951	0.0840644	0.698563	0.0848191	0.705773	0.0841421	0.706024	0.0846103	0.694161	0.0846328	0.709683	0.0848918	0.702736	0.0849495	0.697743	0.0849967	0.698018	0.0846957
																										0.697828	0.0848672	0.713548	0.0847269	0.694551	0.0838433	0.705405	0.0841894	0.703593	0.0849763	0.712765	0.0843331	0.710697	0.0847572	0.702069	0.0848415	0.714442	0.0850373	0.706734	0.0850788	0.702182	0.0851377	0.705279	0.0848925
																										0.702344	0.0850339	0.718601	0.0848952	0.700803	0.0840583	0.708706	0.0843311	0.708399	0.0851546	0.719446	0.0845497	0.715161	0.0849239	0.709626	0.0850781	0.718989	0.0852023	0.710554	0.0852255	0.706423	0.0852977	0.712217	0.0851158
																										0.706561	0.085217	0.72332	0.0850801	0.706642	0.0842945	0.711788	0.0844868	0.712886	0.0853506	0.725685	0.0847878	0.719331	0.085107	0.716684	0.0853381	0.723236	0.0853836	0.714121	0.0853866	0.710384	0.0854736	0.718696	0.0853612
																										0.710398	0.085413	0.727613	0.0852781	0.711953	0.0845474	0.714592	0.0846534	0.716969	0.0855603	0.731362	0.0850426	0.723124	0.085303	0.723105	0.0856164	0.727099	0.0855776	0.717367	0.0855591	0.713988	0.0856617	0.724591	0.0856239
																										0.713779	0.0856181	0.731397	0.0854853	0.716635	0.084812	0.717063	0.0848278	0.720568	0.0857798	0.736366	0.0853092	0.726467	0.0855082	0.728764	0.0859077	0.730504	0.0857807	0.720227	0.0857397	0.717164	0.0858587	0.729786	0.0858987
																										0.716639	0.0858284	0.734598	0.0856976	0.720596	0.0850832	0.719153	0.0850065	0.723612	0.0860048	0.740598	0.0855825	0.729295	0.0857184	0.733552	0.0862062	0.733384	0.0859888	0.722647	0.0859246	0.71985	0.0860605	0.734182	0.0861804
																										0.718923	0.0860396	0.737154	0.085911	0.723758	0.0853557	0.720822	0.085186	0.726042	0.0862308	0.743978	0.0858571	0.731553	0.0859296	0.737375	0.0865061	0.735684	0.086198	0.724579	0.0861105	0.721995	0.0862633	0.737691	0.0864635
																										0.720586	0.0862477	0.739015	0.0861212	0.72606	0.0856241	0.722036	0.0853629	0.727811	0.0864535	0.746439	0.0861277	0.733197	0.0861377	0.740159	0.0868017	0.737358	0.086404	0.725985	0.0862937	0.723557	0.0864631	0.740247	0.0867423
																										0.721595	0.0864487	0.740145	0.0863241	0.727458	0.0858834	0.722773	0.0855337	0.728885	0.0866685	0.747933	0.0863889	0.734195	0.0863387	0.741849	0.0870871	0.738374	0.0866029	0.726838	0.0864705	0.724504	0.086656	0.741798	0.0870117
																										0.72193	0.0866386	0.740522	0.0865159	0.727923	0.0861284	0.723018	0.0856951	0.729243	0.0868717	0.748431	0.0866358	0.734527	0.0865286	0.742413	0.0873567	0.738713	0.0867909	0.727122	0.0866376	0.724819	0.0868383	0.742316	0.0872661
[truncated: 10 more columns]

## Sheet: PlotDat11
Source sheet	Sheet1	0.3	513.655	1	513.5	5.76
Plot name	Average10	22.7	513.655	2	514.4	6.12
Plot Type	15			3	510.4	6.33
1st free col	8			4	507.2	5.32
Sigma Level	1			5	511.6	5.31
Absolute Errs	TRUE			6	511.4	4.25
Symbol Type	1			7	511.1	5.56
Inverse Plot	FALSE			8	516.2	4.52
Color Plot	TRUE			9	515.4	4.6
3D plot	FALSE			10	518.7	5.32
Linear	FALSE			11	512.8	5.21
Data Range	P51:Q72			12	514.2	4.38
Filled Symbols	FALSE			13	511.3	4.78
ConcAge	FALSE			14	513.7	4.36
ConcSwap	FALSE			15	513.1	6.04
1st Symbol-row	1			16	515.9	4.72
				17	516.5	6.88
				18	512	4.89
				19	514.4	4.56
				20	515	4.96
				21	512.6	4.48
				22	517.2	4.46
				IsoLine	IsoLine	IsoLine	IsoLine

## Sheet: PlotDat12
Source sheet	Sheet1	0.65809	0.08292	0.621545	0.0789747	0.637621	0.0806498	0.653855	0.0823274	0.670251	0.0840077	0.68681	0.0856906	0.610973	0.078	0.612306	0.078	0.609648	0.078	0.604365	0.0773023	0.52	0.0848156	0.694662	0.0836557	0.697029	0.0838512	0.695954	0.0832041	0.692848	0.082525	0.699058	0.0832751	0.685373	0.0831087	0.693994	0.0832154	0.66894	0.0839465	0.681325	0.083814	0.677463	0.0844726	0.689205	0.0834674	0.658524	0.0835913	0.652694	0.0831468
Plot name	Concordia11	0.65826	0.08307	0.621492	0.079005	0.637566	0.0806807	0.653799	0.082359	0.670194	0.08404	0.68675	0.0857235	0.610973	0.078	0.613908	0.0781684	0.610973	0.0781401	0.620244	0.0789747	0.74	0.0814125	0.694302	0.0838255	0.696647	0.0840316	0.695587	0.0833897	0.692522	0.0826809	0.698751	0.083431	0.685141	0.083233	0.693672	0.0833783	0.668681	0.0840796	0.681047	0.0839489	0.677142	0.0846303	0.688887	0.0836216	0.658266	0.0837209	0.652412	0.0832869
Plot Type	1	0.6587	0.0824	0.621338	0.0790328	0.637408	0.0807091	0.653636	0.0823881	0.670025	0.0840696	0.686577	0.0857538	0.613908	0.0783091	0.616849	0.078477	0.613908	0.0784498	0.636279	0.0806498			0.693238	0.0839778	0.695519	0.0841932	0.694502	0.0835561	0.691557	0.0828206	0.697845	0.0835707	0.684456	0.0833444	0.692717	0.0835243	0.667916	0.0841989	0.680222	0.0840697	0.676192	0.0847715	0.687946	0.0837597	0.657504	0.0838371	0.651576	0.0834125
1st free col	69	0.6597	0.08185	0.621096	0.0790559	0.637158	0.0807327	0.653379	0.0824122	0.66976	0.0840942	0.686304	0.0857789	0.616849	0.0786183	0.619794	0.0787857	0.616849	0.0787595	0.652474	0.0823274			0.69149	0.0841095	0.693666	0.0843331	0.692721	0.0836999	0.689972	0.0829414	0.696355	0.0836915	0.683331	0.0834408	0.691149	0.0836505	0.66666	0.0843021	0.678866	0.0841743	0.674632	0.0848937	0.686401	0.0838791	0.656251	0.0839375	0.650204	0.0835211
Sigma Level	1	0.66791	0.0826	0.620784	0.0790724	0.636837	0.0807496	0.653048	0.0824294	0.66942	0.0841119	0.685954	0.0857969	0.619794	0.0789276	0.622745	0.0790945	0.619794	0.0790694	0.668829	0.0840077			0.689091	0.084218	0.691123	0.0844483	0.690277	0.0838185	0.687798	0.083041	0.694312	0.083791	0.681788	0.0835202	0.688999	0.0837545	0.664937	0.0843871	0.677007	0.0842604	0.672491	0.0849944	0.684282	0.0839776	0.654533	0.0840203	0.648322	0.0836106
Absolute Errs	TRUE	0.66186	0.08257	0.620429	0.079081	0.63647	0.0807584	0.652671	0.0824384	0.669031	0.084121	0.685554	0.0858063	0.622745	0.0792369	0.625701	0.0794034	0.622745	0.0793793	0.685345	0.0856906			0.686089	0.0843013	0.687941	0.0845367	0.687219	0.0839095	0.685077	0.0831174	0.691755	0.0838674	0.679858	0.0835811	0.686307	0.0838344	0.66278	0.0844523	0.67468	0.0843265	0.669812	0.0850716	0.681629	0.0840531	0.652382	0.0840838	0.645966	0.0836792
Symbol Type	1	0.66121	0.08251	0.620058	0.079081	0.636089	0.0807584	0.652277	0.0824384	0.668626	0.084121	0.685137	0.0858063	0.625701	0.0795464	0.628663	0.0797124	0.625701	0.0796894	IsoLine	IsoLine			0.682542	0.0843576	0.684181	0.0845966	0.683605	0.0839711	0.681863	0.0831691	0.688733	0.0839191	0.677577	0.0836223	0.683127	0.0838884	0.660232	0.0844964	0.671931	0.0843712	0.666647	0.0851239	0.678495	0.0841043	0.649842	0.0841268	0.643183	0.0837257
Inverse Plot	FALSE	0.64267	0.08337	0.619703	0.0790724	0.635722	0.0807496	0.6519	0.0824294	0.668238	0.0841119	0.684737	0.0857969	0.628663	0.0798559	0.63163	0.0800214	0.628663	0.0799995					0.678519	0.084386	0.679917	0.0846267	0.679507	0.0840021	0.678216	0.0831951	0.685307	0.0839451	0.67499	0.0836431	0.679521	0.0839156	0.657342	0.0845187	0.668813	0.0843938	0.663058	0.0851502	0.67494	0.08413	0.64696	0.0841484	0.640027	0.0837491
Color Plot	TRUE	0.65298	0.08323	0.619391	0.0790559	0.635401	0.0807327	0.651569	0.0824122	0.667897	0.0840942	0.684386	0.0857789	0.63163	0.0801656	0.634603	0.0803306	0.63163	0.0803097					0.674099	0.0843859	0.675231	0.0846266	0.675004	0.0840019	0.67421	0.083195	0.681542	0.083945	0.672148	0.083643	0.675558	0.0839154	0.654166	0.0845185	0.665387	0.0843936	0.659113	0.0851501	0.671034	0.0841299	0.643794	0.0841483	0.636559	0.083749
3D plot	FALSE	0.64483	0.08379	0.619149	0.0790328	0.635151	0.0807091	0.651312	0.0823881	0.667632	0.0840696	0.684114	0.0857538	0.634603	0.0804753	0.637581	0.0806398	0.634603	0.08062					0.669367	0.0843572	0.670214	0.0845961	0.670183	0.0839705	0.669921	0.0831687	0.677511	0.0839186	0.669106	0.0836219	0.671316	0.0838879	0.650767	0.084496	0.661719	0.0843709	0.654891	0.0851235	0.666853	0.0841039	0.640405	0.0841264	0.632846	0.0837253
Linear	FALSE	0.65689	0.0828	0.618995	0.079005	0.634993	0.0806807	0.651148	0.082359	0.667464	0.08404	0.68394	0.0857235	0.637581	0.0807851	0.640564	0.0809491	0.637581	0.0809304					0.664415	0.0843006	0.664965	0.084536	0.665139	0.0839086	0.665433	0.0831167	0.673294	0.0838666	0.665922	0.0835804	0.666877	0.0838336	0.64721	0.0844516	0.657882	0.0843259	0.650472	0.0850709	0.662478	0.0840525	0.636858	0.0840832	0.628961	0.0836786
Data Range	H51:K72	0.63233	0.08303	0.618942	0.0789747	0.634938	0.0806498	0.651092	0.0823274	0.667406	0.0840077	0.683881	0.0856906	0.640564	0.081095	0.643553	0.0812585	0.640564	0.0812409					0.659341	0.084217	0.659586	0.0844473	0.65997	0.0838173	0.660833	0.0830401	0.668972	0.08379	0.662659	0.0835193	0.662328	0.0837535	0.643565	0.0843862	0.653948	0.0842596	0.645944	0.0849934	0.657994	0.0839767	0.633223	0.0840194	0.624979	0.0836097
Filled Symbols	FALSE	0.624	0.08254	0.618995	0.0789445	0.634993	0.0806188	0.651148	0.0822958	0.667464	0.0839754	0.68394	0.0856576	0.643553	0.081405	0.646547	0.081568	0.643553	0.0815514					0.654242	0.0841083	0.654181	0.0843318	0.654776	0.0836984	0.656211	0.0829403	0.664629	0.0836902	0.659381	0.0834396	0.657757	0.0836492	0.639902	0.0843009	0.649996	0.0841732	0.641394	0.0848925	0.653488	0.083878	0.629571	0.0839365	0.620979	0.08352
ConcAge	FALSE	0.64865	0.08296	0.619149	0.0789166	0.635151	0.0805904	0.651312	0.0822668	0.667632	0.0839458	0.684114	0.0856274	0.646547	0.0817151	0.649547	0.0818776	0.646547	0.0818621					0.649218	0.0839764	0.648855	0.0841917	0.649658	0.0835543	0.651658	0.0828192	0.66035	0.0835692	0.656151	0.0833431	0.653253	0.0835227	0.636294	0.0841976	0.646102	0.0840685	0.636911	0.0847701	0.649049	0.0837583	0.625973	0.0838358	0.617037	0.0834112
ConcSwap	FALSE	0.63948	0.08285	0.619391	0.0788935	0.635401	0.0805668	0.651569	0.0822427	0.667897	0.0839212	0.684386	0.0856022	0.649547	0.0820252	0.652552	0.0821873	0.649547	0.0821728					0.644366	0.0838239	0.643712	0.0840298	0.644717	0.0833877	0.647261	0.0826794	0.656218	0.0834293	0.653032	0.0832315	0.648904	0.0833765	0.632809	0.0840781	0.642342	0.0839475	0.632583	0.0846286	0.644763	0.08362	0.622498	0.0837195	0.613231	0.0832854
1st Symbol-row	1	0.62522	0.08332	0.619703	0.078877	0.635722	0.0805499	0.6519	0.0822254	0.668238	0.0839035	0.684737	0.0855842	0.652552	0.0823355	0.655563	0.0824971	0.652552	0.0824837					0.639782	0.0836539	0.638852	0.0838493	0.640047	0.0832018	0.643105	0.0825233	0.652314	0.0832732	0.650085	0.083107	0.644795	0.0832135	0.629516	0.0839449	0.638789	0.0838125	0.628492	0.0844709	0.640712	0.0834657	0.619215	0.0835898	0.609634	0.0831452
		0.62654	0.08342	0.620058	0.0788684	0.636089	0.0805411	0.652277	0.0822164	0.668626	0.0838944	0.685137	0.0855749	0.655563	0.0826458	0.658579	0.0828069	0.655563	0.0827946					0.635554	0.0834695	0.63437	0.0836535	0.635741	0.0830004	0.639273	0.0823542	0.648713	0.0831041	0.647367	0.082972	0.641005	0.0830368	0.626479	0.0838004	0.635512	0.0836662	0.62472	0.0842998	0.636976	0.0832985	0.616187	0.0834491	0.606317	0.0829932
		0.6143	0.08267	0.620429	0.0788684	0.63647	0.0805411	0.652671	0.0822164	0.669031	0.0838944	0.685554	0.0855749	0.658579	0.0829563	0.6616	0.0831169	0.658579	0.0831056					0.631765	0.0832745	0.630353	0.0834464	0.631881	0.0827872	0.635839	0.0821753	0.645486	0.0829251	0.644932	0.0828293	0.637609	0.0828498	0.623758	0.0836476	0.632576	0.0835114	0.621339	0.0841189	0.633628	0.0831216	0.613473	0.0833004	0.603344	0.0828323
		0.63396	0.08306	0.620784	0.078877	0.636837	0.0805499	0.653048	0.0822254	0.66942	0.0839035	0.685954	0.0855842	0.6616	0.0832668	0.664627	0.0834269	0.6616	0.0834167					0.628488	0.0830726	0.62688	0.083232	0.628544	0.0825666	0.632869	0.08199	0.642696	0.0827399	0.642825	0.0826815	0.634672	0.0826562	0.621404	0.0834894	0.630036	0.0833511	0.618415	0.0839315	0.630733	0.0829384	0.611126	0.0831463	0.600773	0.0826658
		0.64938	0.08317	0.621096	0.0788935	0.637158	0.0805668	0.653379	0.0822427	0.66976	0.0839212	0.686304	0.0856022	0.664627	0.0835774	0.66766	0.083737	0.664627	0.0837279					0.625787	0.0828677	0.624017	0.0830144	0.625793	0.0823427	0.630421	0.081802	0.640396	0.0825518	0.64109	0.0825315	0.632251	0.0824597	0.619465	0.0833289	0.627943	0.0831884	0.616005	0.0837414	0.628347	0.0827525	0.609192	0.08299	0.598654	0.0824968
		0.61189	0.08276	0.621338	0.0789166	0.637408	0.0805904	0.653636	0.0822668	0.670025	0.0839458	0.686577	0.0856274	0.66766	0.0838881	0.670698	0.0840472	0.66766	0.0840392					0.623715	0.0826638	0.62182	0.082798	0.623683	0.0821199	0.628543	0.0816149	0.638632	0.0823648	0.639758	0.0823823	0.630394	0.0822642	0.617977	0.0831691	0.626337	0.0830266	0.614157	0.0835522	0.626516	0.0825675	0.607708	0.0828344	0.597029	0.0823286
		0.60697	0.08354	0.621492	0.0789445	0.637566	0.0806188	0.653799	0.0822958	0.670194	0.0839754	0.68675	0.0856576	0.670698	0.0841989	0.673742	0.0843575	0.670698	0.0843506					0.622312	0.0824649	0.620333	0.0825868	0.622254	0.0819025	0.627272	0.0814324	0.637437	0.0821823	0.638857	0.0822367	0.629137	0.0820735	0.61697	0.0830133	0.62525	0.0828687	0.612905	0.0833677	0.625277	0.0823871	0.606704	0.0826827	0.595929	0.0821646
		IsoLine	IsoLine	0.621545	0.0789747	0.637621	0.0806498	0.653855	0.0823274	0.670251	0.0840077	0.68681	0.0856906	0.673742	0.0845098	0.676791	0.0846679	0.673742	0.084662					0.621606	0.0822749	0.619584	0.082385	0.621535	0.0816949	0.626631	0.0812581	0.636836	0.0820079	0.638403	0.0820976	0.628504	0.0818913	0.616463	0.0828644	0.624702	0.0827179	0.612275	0.0831914	0.624652	0.0822147	0.606198	0.0825377	0.595375	0.0820079
				ConcTikEll	ConcTikEll	ConcTikEll	ConcTikEll	ConcTikEll	ConcTikEll	ConcTikEll	ConcTikEll	ConcTikEll	ConcTikEll	0.676791	0.0848207	0.679846	0.0849784	0.676791	0.0849736					0.621609	0.0820974	0.619588	0.0821965	0.621539	0.0815009	0.626635	0.0810952	0.63684	0.0818451	0.638406	0.0819677	0.628507	0.0817212	0.616466	0.0827254	0.624705	0.082577	0.612278	0.0830267	0.624656	0.0820537	0.606201	0.0824024	0.595378	0.0818615
														0.679846	0.0851318	0.682906	0.0852889	0.679846	0.0852852					0.622323	0.0819359	0.620344	0.0820251	0.622267	0.0813245	0.627281	0.0809471	0.637448	0.081697	0.638866	0.0818495	0.629148	0.0815664	0.616979	0.0825989	0.625258	0.0824488	0.612915	0.0828769	0.625286	0.0819072	0.606713	0.0822792	0.595938	0.0817283
														0.682906	0.0854429	0.685972	0.0855996	0.682906	0.0855969					0.623733	0.0817936	0.621839	0.0818739	0.623703	0.081169	0.628559	0.0808165	0.638649	0.0815664	0.639773	0.0817454	0.630412	0.08143	0.617992	0.0824874	0.626351	0.0823358	0.614174	0.0827448	0.626532	0.0817781	0.607723	0.0821706	0.597044	0.081611
														0.685972	0.0857542	0.689044	0.0859103	0.685972	0.0859088					0.625811	0.0816732	0.624042	0.0817461	0.625821	0.0810374	0.630443	0.080706	0.64042	0.081456	0.64111	0.0816573	0.632275	0.0813146	0.619485	0.0823931	0.627962	0.0822403	0.616029	0.0826332	0.628369	0.0816689	0.609212	0.0820788	0.598675	0.0815117
														0.689044	0.0860655	0.692121	0.0862212	0.689044	0.0862207					0.628518	0.0815771	0.626912	0.081644	0.628579	0.0809324	0.632897	0.0806178	0.642726	0.0813678	0.64285	0.081587	0.634702	0.0812224	0.62143	0.0823178	0.63006	0.082164	0.618444	0.082544	0.630761	0.0815817	0.611151	0.0820055	0.600799	0.0814324
														0.692121	0.0863769	0.695204	0.0865321	0.692121	0.0865327					0.6318	0.0815071	0.630391	0.0815697	0.631923	0.080856	0.635872	0.0805536	0.645521	0.0813036	0.644961	0.0815358	0.637645	0.0811553	0.623788	0.0822629	0.632604	0.0821084	0.621373	0.082479	0.633661	0.0815182	0.613502	0.0819521	0.603375	0.0813747
														0.695204	0.0866884	0.698292	0.0868431	0.695204	0.0868447					0.635594	0.0814646	0.634413	0.0815246	0.635788	0.0808096	0.639311	0.0805146	0.648753	0.0812646	0.647401	0.0815047	0.641047	0.0811146	0.626514	0.0822297	0.635545	0.0820747	0.624759	0.0824396	0.637014	0.0814796	0.61622	0.0819197	0.606352	0.0813397
														0.698292	0.087	0.699853	0.087	0.69674	0.087					0.639826	0.0814505	0.638899	0.0815096	0.640099	0.0807941	0.643147	0.0805017	0.652358	0.0812517	0.650122	0.0814944	0.644841	0.0811011	0.629554	0.0822186	0.638825	0.0820635	0.628535	0.0824265	0.640753	0.0814668	0.619251	0.0819089	0.609672	0.081328
														0.698292	0.087	ConcBand	ConcBand	ConcBand	ConcBand					0.644414	0.0814649	0.643762	0.0815249	0.644772	0.0808099	0.647305	0.0805149	0.656265	0.0812649	0.653072	0.081505	0.648953	0.0811149	0.632849	0.0822299	0.642381	0.0820749	0.632628	0.0824399	0.644807	0.0814799	0.622537	0.0819199	0.613272	0.0813399
														IsoLine	IsoLine									0.649267	0.0815077	0.648907	0.0815703	0.649717	0.0808567	0.651704	0.0805542	0.660399	0.0813042	0.656192	0.0815363	0.653304	0.081156	0.636336	0.0822635	0.646143	0.0821089	0.636959	0.0824796	0.649096	0.0815187	0.626013	0.0819526	0.61708	0.0813752
																								0.654293	0.0815779	0.654235	0.0816449	0.654836	0.0809335	0.656259	0.0806186	0.664679	0.0813687	0.659423	0.0815878	0.657809	0.0812233	0.639946	0.0823185	0.650038	0.0821647	0.641443	0.0825448	0.653536	0.0815825	0.629613	0.0820062	0.621023	0.0814332
																								0.659392	0.0816743	0.65964	0.0817473	0.66003	0.0810388	0.660881	0.0807071	0.669022	0.0814571	0.662702	0.0816583	0.66238	0.0813158	0.643609	0.0823941	0.65399	0.0822412	0.645994	0.0826342	0.658042	0.0816699	0.633265	0.0820797	0.625024	0.0815127
																								0.664466	0.0817949	0.665019	0.0818753	0.665199	0.0811707	0.665479	0.0808177	0.673344	0.0815678	0.665964	0.0817466	0.666929	0.0814314	0.647253	0.0824886	0.657923	0.0823369	0.650521	0.0827462	0.662525	0.0817794	0.636899	0.0821718	0.629004	0.0816122
																								0.669416	0.0819375	0.670266	0.0820267	0.670241	0.0813264	0.669966	0.0809485	0.677559	0.0816986	0.669146	0.081851	0.671366	0.0815681	0.650809	0.0826003	0.661759	0.0824501	0.654938	0.0828784	0.666898	0.0819087	0.640444	0.0822805	0.632888	0.0817297
																								0.674145	0.0820991	0.675279	0.0821983	0.675058	0.0815031	0.674252	0.0810968	0.681587	0.0818469	0.672186	0.0819693	0.675605	0.0817231	0.654206	0.0827269	0.665425	0.0825784	0.659157	0.0830284	0.671077	0.0820553	0.643831	0.0824038	0.636598	0.081863
																								0.678562	0.0822767	0.679962	0.0823869	0.679557	0.0816972	0.678256	0.0812598	0.685349	0.0820099	0.675026	0.0820993	0.679565	0.0818934	0.657378	0.0828661	0.668848	0.0827194	0.663099	0.0831932	0.67498	0.0822165	0.646995	0.0825393	0.640064	0.0820095
																								0.68258	0.0824669	0.684221	0.0825888	0.68365	0.081905	0.681898	0.0814343	0.688771	0.0821844	0.677609	0.0822385	0.683166	0.0820757	0.660264	0.0830151	0.671962	0.0828703	0.666684	0.0833696	0.67853	0.082389	0.649873	0.0826844	0.643216	0.0821664
																								0.686122	0.0826658	0.687976	0.0828001	0.687257	0.0821224	0.685108	0.0816168	0.691787	0.0823669	0.679885	0.0823842	0.686341	0.0822665	0.662808	0.083171	0.674707	0.0830283	0.669844	0.0835542	0.68166	0.0825695	0.652409	0.0828362	0.645995	0.0823305
																								0.689118	0.0828697	0.691152	0.0830166	0.690309	0.0823452	0.687824	0.0818039	0.694339	0.082554	0.681811	0.0825334	0.689027	0.082462	0.66496	0.0833308	0.677029	0.0831901	0.672517	0.0837434	0.684307	0.0827545	0.654555	0.0829918	0.648346	0.0824986
																								0.69151	0.0830746	0.693688	0.0832342	0.692745	0.0825691	0.689992	0.0819919	0.696376	0.082742	0.683348	0.0826834	0.691171	0.0826584	0.666678	0.0834913	0.678883	0.0833528	0.674652	0.0839335	0.686421	0.0829403	0.656268	0.0831481	0.650222	0.0826676
																								0.693252	0.0832765	0.695534	0.0834486	0.694519	0.0827898	0.69157	0.0821771	0.697858	0.0829273	0.684468	0.0828312	0.692732	0.0828519	0.667928	0.0836495	0.680233	0.083513	0.676205	0.0841209	0.687959	0.0831235	0.657515	0.0833021	0.651588	0.0828341
																								0.694309	0.0834715	0.696655	0.0836556	0.695595	0.0830028	0.692529	0.082356	0.698759	0.0831061	0.685147	0.0829738	0.693679	0.0830388	0.668687	0.0838022	0.681052	0.0836678	0.677149	0.0843017	0.688893	0.0833003	0.658272	0.0834508	0.652418	0.0829949
																								0.694662	0.0836557	0.697029	0.0838512	0.695954	0.0832041	0.692848	0.082525	0.699058	0.0832751	0.685373	0.0831087	0.693994	0.0832154	0.66894	0.0839465	0.681325	0.083814	0.677463	0.0844726	0.689205	0.0834674	0.658524	0.0835913	0.652694	0.0831468
[truncated: 18 more columns]

## Sheet: PlotDat13
Source sheet	Sheet1	0.3	532.548	1	534.3	9.88
Plot name	Average12	20.7	532.548	2	539.3	9.42
Plot Type	15			3	532.5	9.69
1st free col	8			4	527.4	8.92
Sigma Level	1			5	533.2	8.88
Absolute Errs	TRUE			6	533.1	9.46
Symbol Type	1			7	536.4	8.41
Inverse Plot	FALSE			8	532.6	8.93
Color Plot	TRUE			9	534.3	8.91
3D plot	FALSE			10	532	8.87
Linear	FALSE			11	534.2	9.47
Data Range	P29:Q48			12	531.7	8.55
Filled Symbols	FALSE			13	531.1	8.57
ConcAge	FALSE			14	530.1	9.03
ConcSwap	FALSE			15	534.3	9.32
1st Symbol-row	1			16	533.5	8.37
				17	532.1	8.17
				18	527	13.53
				19	529	10.02
				20	530.3	8.4
				IsoLine	IsoLine	IsoLine	IsoLine

## Sheet: PlotDat14
Source sheet	Sheet1	0.68246	0.08641	0.637621	0.0806498	0.670251	0.0840077	0.703532	0.087376	0.737476	0.0907549	0.610973	0.078	0.612307	0.078	0.609648	0.078	0.604365	0.0773023	0.568625	0.093	0.72241	0.0876712	0.716264	0.0884598	0.724592	0.0873487	0.707263	0.086392	0.697754	0.0873632	0.71577	0.0874181	0.694068	0.0878554	0.710071	0.087261	0.712342	0.0875513	0.704888	0.0871638	0.724002	0.0876056	0.704993	0.087067	0.706794	0.0869663	0.696394	0.0868654
Plot name	Concordia13	0.68501	0.08725	0.637566	0.0806807	0.670194	0.08404	0.703471	0.0874097	0.737412	0.0907898	0.610973	0.078	0.615854	0.0783727	0.610973	0.0781401	0.636279	0.0806498	0.812026	0.078	0.722012	0.0879617	0.715949	0.0887379	0.724216	0.087634	0.706873	0.0866998	0.697396	0.0876709	0.715392	0.0876963	0.693784	0.0881464	0.709765	0.0875234	0.711927	0.0878592	0.704478	0.0874696	0.723617	0.0878856	0.704637	0.0873624	0.706417	0.0872618	0.696056	0.0871314
Plot Type	1	0.68696	0.08611	0.637408	0.0807091	0.670025	0.0840696	0.703293	0.0874405	0.737223	0.090822	0.615854	0.0785138	0.62075	0.0788858	0.615854	0.0786549	0.668829	0.0840077			0.720844	0.0882221	0.715031	0.0889871	0.723115	0.0878896	0.705741	0.0869681	0.696359	0.0879389	0.714284	0.0879457	0.692975	0.0883997	0.708872	0.0877585	0.710717	0.0881275	0.703287	0.0877361	0.722488	0.0881365	0.703605	0.0876198	0.705322	0.0875193	0.695066	0.0873697
1st free col	63	0.67966	0.08525	0.637158	0.0807327	0.66976	0.0840942	0.703012	0.0874662	0.736926	0.0908486	0.62075	0.0790278	0.625661	0.0793992	0.62075	0.0791699	0.702025	0.087376			0.718928	0.0884471	0.713529	0.0892024	0.72131	0.0881105	0.703897	0.0871895	0.694672	0.0881602	0.712467	0.0881613	0.691662	0.0886086	0.707411	0.0879617	0.708745	0.088349	0.701346	0.0879561	0.720638	0.0883535	0.701925	0.0878323	0.70354	0.0877318	0.693443	0.0875757
Sigma Level	1	0.67253	0.08622	0.636837	0.0807496	0.66942	0.0841119	0.702651	0.0874846	0.736545	0.0908677	0.625661	0.0795421	0.630586	0.0799127	0.625661	0.0796851	0.735883	0.0907549			0.716303	0.0886325	0.711472	0.0893798	0.718837	0.0882925	0.701393	0.0873579	0.692381	0.0883284	0.709977	0.0883388	0.689881	0.0887674	0.705409	0.0881291	0.706066	0.0885176	0.698708	0.0881236	0.718101	0.0885322	0.699643	0.0879939	0.701118	0.0878936	0.69122	0.0877454
Absolute Errs	TRUE	0.67788	0.08621	0.63647	0.0807584	0.669031	0.084121	0.70224	0.0874941	0.736109	0.0908777	0.630586	0.0800567	0.635527	0.0804265	0.630586	0.0802006	IsoLine	IsoLine			0.713019	0.0887747	0.7089	0.0895157	0.715743	0.0884321	0.698295	0.0874689	0.689549	0.0884392	0.706863	0.088475	0.687681	0.0888717	0.702906	0.0882573	0.702752	0.0886287	0.695445	0.088234	0.714928	0.0886692	0.696822	0.0881003	0.698122	0.0880002	0.68844	0.0878755
Symbol Type	1	0.67451	0.08677	0.636089	0.0807584	0.668626	0.084121	0.701811	0.0874941	0.735656	0.0908777	0.635527	0.0805714	0.640482	0.0809406	0.635527	0.0807163					0.709141	0.0888708	0.705863	0.0896075	0.712089	0.0885264	0.694689	0.0875194	0.686252	0.0884895	0.703184	0.0885671	0.685121	0.0889186	0.699951	0.088344	0.698894	0.0886793	0.691646	0.0882842	0.711181	0.0887619	0.693538	0.0881487	0.694635	0.0880486	0.685156	0.0879634
Inverse Plot	FALSE	0.67965	0.08612	0.635722	0.0807496	0.668238	0.0841119	0.7014	0.0874846	0.735221	0.0908677	0.640482	0.0810865	0.645452	0.0814549	0.640482	0.0812323					0.704743	0.088919	0.70242	0.0896534	0.707945	0.0885737	0.690674	0.0875079	0.682581	0.0884778	0.699013	0.0886133	0.682272	0.0889069	0.6966	0.0883873	0.694597	0.088668	0.687415	0.088273	0.706931	0.0888084	0.689881	0.0881375	0.690752	0.0880376	0.681432	0.0880075
Color Plot	TRUE	0.6828	0.08641	0.635401	0.0807327	0.667897	0.0840942	0.701039	0.0874662	0.734839	0.0908486	0.645452	0.0816017	0.650438	0.0819695	0.645452	0.0817486					0.699911	0.0889184	0.698638	0.0896525	0.703394	0.0885731	0.686357	0.0874349	0.678636	0.0884045	0.69443	0.0886127	0.679211	0.088837	0.692919	0.0883866	0.689979	0.0885951	0.682867	0.0882005	0.702263	0.0888078	0.68595	0.0880673	0.686578	0.0879675	0.677342	0.0880068
3D plot	FALSE	0.6758	0.08603	0.635151	0.0807091	0.667632	0.0840696	0.700758	0.0874405	0.734542	0.090822	0.650438	0.0821172	0.655438	0.0824843	0.650438	0.082265					0.69474	0.088869	0.694591	0.0896049	0.698522	0.0885245	0.681858	0.0873023	0.674524	0.0882717	0.689525	0.0885653	0.676022	0.0887107	0.68898	0.0883417	0.685164	0.0884626	0.678126	0.0880689	0.697266	0.0887601	0.681853	0.0879399	0.682227	0.0878402	0.672965	0.0879615
Linear	FALSE	0.6854	0.08639	0.634993	0.0806807	0.667464	0.08404	0.70058	0.0874097	0.734354	0.0907898	0.655438	0.082633	0.660454	0.0829993	0.655438	0.0827818					0.68933	0.0887717	0.690358	0.0895114	0.693426	0.0884289	0.6773	0.0871137	0.670358	0.0880829	0.684394	0.0884721	0.672792	0.0885314	0.68486	0.0882535	0.680285	0.0882741	0.673322	0.0878817	0.692038	0.0886664	0.677702	0.0877587	0.677818	0.0876592	0.668385	0.0878723
Data Range	H29:K48	0.67986	0.08597	0.634938	0.0806498	0.667406	0.0840077	0.700519	0.087376	0.734289	0.0907549	0.660454	0.083149	0.665485	0.0835146	0.660454	0.0832987					0.683786	0.0886285	0.68602	0.0893739	0.688203	0.0882882	0.672805	0.0868742	0.666251	0.0878433	0.679136	0.0883349	0.669609	0.0883041	0.680638	0.0881239	0.675474	0.0880348	0.668586	0.0876439	0.686681	0.0885283	0.67361	0.0875287	0.673472	0.0874293	0.663692	0.0877411
Filled Symbols	FALSE	0.6801	0.08587	0.634993	0.0806188	0.667464	0.0839754	0.70058	0.0873424	0.734354	0.0907199	0.665485	0.0836653	0.670531	0.0840301	0.665485	0.0838159					0.678216	0.088442	0.681663	0.0891951	0.682956	0.0881051	0.668498	0.0865904	0.662316	0.0875594	0.673853	0.0881563	0.666559	0.0880349	0.676397	0.0879552	0.670864	0.0877511	0.664046	0.0873621	0.681299	0.0883486	0.669689	0.0872562	0.669306	0.0871569	0.658978	0.0875703
ConcAge	FALSE	0.66258	0.08571	0.635151	0.0805904	0.667632	0.0839458	0.700758	0.0873116	0.734542	0.0906878	0.670531	0.0841818	0.675592	0.0845459	0.670531	0.0843334					0.672729	0.088216	0.677371	0.0889784	0.677788	0.0878831	0.664495	0.0862701	0.658659	0.0872389	0.668649	0.0879398	0.663726	0.0877312	0.672219	0.0877509	0.666578	0.0874309	0.659827	0.087044	0.675997	0.0881308	0.666044	0.0869487	0.665435	0.0868494	0.654334	0.0873633
ConcSwap	FALSE	0.67051	0.08641	0.635401	0.0805668	0.667897	0.0839212	0.701039	0.0872859	0.734839	0.0906611	0.675592	0.0846985	0.680669	0.0850619	0.675592	0.0848511					0.667431	0.0879549	0.673227	0.0887281	0.672798	0.0876267	0.660905	0.085922	0.655381	0.0868907	0.663625	0.0876897	0.661188	0.0874014	0.668186	0.0875147	0.662736	0.0870828	0.656043	0.0866982	0.670878	0.0878791	0.662777	0.0866144	0.661964	0.0865152	0.64985	0.0871241
1st Symbol-row	1	0.6879	0.08628	0.635722	0.0805499	0.668238	0.0839035	0.7014	0.0872675	0.735221	0.090642	0.680669	0.0852155	0.685761	0.0855782	0.680669	0.0853691					0.662425	0.0876637	0.669313	0.088449	0.668083	0.0873407	0.657827	0.0855555	0.65257	0.0865242	0.658878	0.0874108	0.659013	0.0870543	0.664376	0.0872515	0.65944	0.0867163	0.652799	0.0863342	0.666042	0.0875984	0.659976	0.0862626	0.658987	0.0861634	0.645614	0.0868574
		0.68235	0.08604	0.636089	0.0805411	0.668626	0.0838944	0.701811	0.087258	0.735656	0.0906321	0.685761	0.0857327	0.690869	0.0860947	0.685761	0.0858873					0.65781	0.0873481	0.665705	0.0881466	0.663736	0.0870308	0.655345	0.0851807	0.650303	0.0861494	0.6545	0.0871084	0.65726	0.0866994	0.660863	0.0869662	0.656782	0.0863415	0.650182	0.0859619	0.661582	0.0872942	0.657717	0.0859027	0.656587	0.0858036	0.641708	0.0865683
		0.69055	0.08518	0.63647	0.0805411	0.669031	0.0838944	0.70224	0.087258	0.736109	0.0906321	0.690869	0.0862502	0.695992	0.0866115	0.690869	0.0864057					0.653675	0.0870142	0.662472	0.0878267	0.659841	0.0867029	0.653526	0.0848078	0.648643	0.0857765	0.650578	0.0867886	0.655978	0.0863465	0.657716	0.0866644	0.654834	0.0859686	0.648264	0.0855915	0.657586	0.0869724	0.656062	0.0855448	0.654827	0.0854456	0.638209	0.0862626
		0.68742	0.08553	0.636837	0.0805499	0.66942	0.0839035	0.702651	0.0872675	0.736545	0.090642	0.695992	0.086768	0.70113	0.0871285	0.695992	0.0869244					0.650099	0.0866686	0.659678	0.0874956	0.656474	0.0863635	0.65242	0.0844469	0.647635	0.0854157	0.647187	0.0864576	0.655202	0.0860051	0.654996	0.0863521	0.653648	0.0856077	0.647097	0.085233	0.654132	0.0866393	0.655056	0.0851984	0.653757	0.0850991	0.635184	0.0859461
		0.68728	0.08575	0.637158	0.0805668	0.66976	0.0839212	0.703012	0.0872859	0.736926	0.0906611	0.70113	0.0872859	0.706284	0.0876457	0.70113	0.0874434					0.647154	0.0863179	0.657376	0.0871597	0.6537	0.0860192	0.652057	0.084108	0.647306	0.0850768	0.644394	0.0861217	0.654952	0.0856846	0.652755	0.0860352	0.653258	0.0852687	0.646712	0.0848962	0.651286	0.0863013	0.654727	0.084873	0.653406	0.0847737	0.632692	0.085625
		IsoLine	IsoLine	0.637408	0.0805904	0.670025	0.0839458	0.703293	0.0873116	0.737223	0.0906878	0.706284	0.0878042	0.711454	0.0881632	0.706284	0.0879626					0.644896	0.085969	0.655613	0.0868256	0.651573	0.0856766	0.652447	0.0838002	0.647664	0.0847691	0.642253	0.0857876	0.655236	0.0853936	0.651039	0.08572	0.653673	0.0849608	0.647122	0.0845904	0.649104	0.085965	0.655083	0.0845776	0.653783	0.0844782	0.630782	0.0853056
				0.637566	0.0806188	0.670194	0.0839754	0.703471	0.0873424	0.737412	0.0907199	0.711454	0.0883226	0.716639	0.088681	0.711454	0.088482					0.643369	0.0856287	0.654422	0.0864997	0.650136	0.0853425	0.653579	0.0835319	0.648701	0.0845011	0.640804	0.0854616	0.656045	0.0851403	0.649879	0.0854125	0.654883	0.0846925	0.648313	0.0843239	0.647628	0.085637	0.656115	0.0843202	0.654878	0.0842207	0.62949	0.084994
				0.637621	0.0806498	0.670251	0.0840077	0.703532	0.087376	0.737476	0.0907549	0.716639	0.0888413	0.72184	0.089199	0.716639	0.0890017					0.642602	0.0853037	0.653826	0.0861885	0.649415	0.0850233	0.655423	0.0833105	0.650388	0.0842798	0.640078	0.0851502	0.657358	0.0849314	0.649298	0.0851189	0.656855	0.084471	0.650254	0.0841039	0.646888	0.0853237	0.657795	0.0841077	0.65666	0.0840082	0.628843	0.0846964
				ConcTikEll	ConcTikEll	ConcTikEll	ConcTikEll	ConcTikEll	ConcTikEll	ConcTikEll	ConcTikEll	0.72184	0.0893603	0.727057	0.0897172	0.72184	0.0895217					0.642612	0.0850001	0.653838	0.0858979	0.649424	0.0847253	0.657927	0.0831421	0.652679	0.0841116	0.640087	0.0848595	0.659139	0.0847726	0.649308	0.0848447	0.659534	0.0843024	0.652892	0.0839364	0.646897	0.0850311	0.660077	0.0839461	0.659082	0.0838464	0.628853	0.0844185
												0.727057	0.0898795	0.73229	0.0902357	0.727057	0.0900418					0.643397	0.084724	0.654456	0.0856336	0.650165	0.0844542	0.661025	0.0830311	0.655511	0.0840008	0.640832	0.084595	0.661339	0.0846683	0.649909	0.0845953	0.662848	0.0841913	0.656155	0.083826	0.647655	0.084765	0.662898	0.0838397	0.662078	0.0837398	0.629519	0.0841657
												0.73229	0.090399	0.737538	0.0907544	0.73229	0.0905623					0.644943	0.0844807	0.655668	0.0854007	0.651621	0.0842153	0.664631	0.0829806	0.658808	0.0839505	0.642298	0.084362	0.663899	0.0846214	0.651089	0.0843756	0.666706	0.0841407	0.659954	0.0837758	0.649149	0.0845305	0.666182	0.0837913	0.665565	0.0836914	0.630828	0.083943
												0.737538	0.0909187	0.742803	0.0912734	0.737538	0.091083					0.647218	0.084275	0.657452	0.0852039	0.653766	0.0840134	0.668646	0.0829921	0.662479	0.0839622	0.644457	0.084165	0.666748	0.0846331	0.652825	0.0841899	0.671003	0.084152	0.664185	0.083787	0.651348	0.0843322	0.669839	0.0838025	0.669448	0.0837024	0.632756	0.0837547
												0.742803	0.0914386	0.748083	0.0917926	0.742803	0.0916039					0.65018	0.0841108	0.659772	0.0850469	0.656556	0.0838522	0.672963	0.0830651	0.666424	0.0840355	0.647266	0.0840077	0.669809	0.084703	0.655082	0.0840418	0.675621	0.0842249	0.668733	0.0838595	0.654209	0.0841739	0.67377	0.0838727	0.673622	0.0837725	0.635264	0.0836044
												0.748083	0.0919588	0.75338	0.0923121	0.748083	0.0921251					0.65377	0.0839914	0.662584	0.0849328	0.659939	0.083735	0.677462	0.0831977	0.670536	0.0841683	0.650671	0.0838933	0.672998	0.0848293	0.657818	0.083934	0.680436	0.0843574	0.673474	0.0839911	0.657678	0.0840588	0.677867	0.0840001	0.677973	0.0838998	0.638303	0.0834952
												0.75338	0.0924793	0.758692	0.0928318	0.75338	0.0926465					0.657918	0.083919	0.665832	0.0848638	0.663847	0.083664	0.68202	0.0833863	0.674702	0.0843571	0.654605	0.083824	0.676228	0.0850086	0.660979	0.0838689	0.685315	0.0845459	0.678278	0.0841783	0.661686	0.083989	0.682018	0.0841813	0.682382	0.0840808	0.641815	0.083429
												0.758692	0.093	0.760416	0.093	0.756979	0.093					0.662544	0.0838951	0.669453	0.0848412	0.668205	0.0836406	0.686515	0.0836258	0.678809	0.0845967	0.658993	0.0838012	0.679411	0.0852359	0.664503	0.0838475	0.690126	0.0847852	0.683014	0.0844161	0.666156	0.083966	0.68611	0.0844113	0.686728	0.0843107	0.645732	0.0834072
												0.758692	0.093	ConcBand	ConcBand	ConcBand	ConcBand					0.667558	0.0839202	0.673377	0.0848655	0.672928	0.0836653	0.690822	0.0839096	0.682744	0.0848806	0.663748	0.0838252	0.682461	0.0855051	0.668322	0.0838704	0.694736	0.0850689	0.687554	0.0846979	0.671001	0.0839902	0.690031	0.0846838	0.690894	0.0845831	0.649976	0.0834303
												IsoLine	IsoLine									0.672862	0.0839937	0.677527	0.0849362	0.677924	0.0837375	0.694825	0.0842299	0.686401	0.0852011	0.668778	0.0838957	0.685294	0.0858088	0.672362	0.0839371	0.699022	0.0853891	0.691773	0.085016	0.676125	0.0840611	0.693676	0.0849913	0.694765	0.0848906	0.654466	0.0834977
																						0.678352	0.0841143	0.681823	0.085052	0.683096	0.0838559	0.698415	0.084578	0.689679	0.0855493	0.673986	0.0840111	0.687832	0.0861386	0.676543	0.0840462	0.702864	0.0857372	0.695557	0.0853618	0.681431	0.0841773	0.696943	0.0853256	0.698236	0.0852248	0.659113	0.0836082
																						0.683923	0.0842796	0.686181	0.0852105	0.688344	0.0840183	0.701493	0.0849445	0.69249	0.0859158	0.679269	0.0841694	0.690007	0.0864857	0.680785	0.0841958	0.70616	0.0861037	0.698801	0.0857258	0.686813	0.0843365	0.699744	0.0856774	0.701213	0.0855766	0.663828	0.0837596
																						0.689465	0.0844863	0.690517	0.0854087	0.693564	0.0842213	0.703975	0.0853193	0.694757	0.0862906	0.684525	0.0843674	0.69176	0.0868406	0.685005	0.0843827	0.708818	0.0864785	0.701418	0.0860981	0.692168	0.0845358	0.702003	0.0860373	0.703613	0.0859364	0.668519	0.083949
																						0.694871	0.0847304	0.694745	0.0856428	0.698656	0.0844611	0.705794	0.0856922	0.696417	0.0866635	0.689652	0.0846013	0.693042	0.0871935	0.689121	0.0846035	0.710766	0.0868514	0.703336	0.0864685	0.697391	0.0847711	0.703658	0.0863952	0.705373	0.0862944	0.673094	0.0841726
																						0.700035	0.0850073	0.698783	0.0859082	0.70352	0.0847329	0.7069	0.0860531	0.697425	0.0870243	0.694549	0.0848665	0.693818	0.0875349	0.693052	0.0848538	0.711952	0.0872123	0.704503	0.086827	0.702381	0.085038	0.704664	0.0867416	0.706443	0.0866409	0.677464	0.0844261
																						0.704857	0.0853114	0.702554	0.0861996	0.708062	0.0850316	0.707263	0.086392	0.697754	0.0873632	0.699123	0.0851578	0.694068	0.0878554	0.696722	0.0851288	0.712342	0.0875513	0.704888	0.0871638	0.707041	0.0853311	0.704993	0.087067	0.706794	0.0869663	0.681545	0.0847047
																						0.709243	0.085637	0.705983	0.0865115	0.712193	0.0853513					0.703283	0.0854696			0.70006	0.085423					0.711279	0.0856449					0.685257	0.0850028
																						0.713108	0.0859776	0.709004	0.0868378	0.715833	0.0856857					0.706948	0.0857959			0.703001	0.0857308					0.715013	0.0859732					0.688527	0.0853147
																						0.716376	0.0863266	0.711558	0.0871721	0.718911	0.0860284					0.710048	0.0861302			0.705487	0.0860462					0.718171	0.0863095					0.691292	0.0856343
																						0.718984	0.0866772	0.713595	0.087508	0.721367	0.0863727					0.712521	0.086466			0.707471	0.086363					0.720691	0.0866475					0.693499	0.0859553
																						0.720881	0.0870226	0.715076	0.0878388	0.723154	0.0867119					0.71432	0.0867968			0.708913	0.0866751					0.722525	0.0869804					0.695103	0.0862716
																						0.722031	0.0873561	0.715971	0.0881581	0.724236	0.0870393					0.71541	0.0871163			0.709785	0.0869764					0.723635	0.0873019					0.696075	0.0865769
																						0.72241	0.0876712	0.716264	0.0884598	0.724592	0.0873487					0.71577	0.0874181			0.710071	0.087261					0.724002	0.0876056					0.696394	0.0868654
[truncated: 12 more columns]

## Sheet: PlotDat15
Source sheet	Sheet1	0.3	513.145	1	517.7	5.31
Plot name	Average14	22.7	513.145	2	515.4	4.53
Plot Type	15			3	514.7	5.49
1st free col	8			4	513.9	4.89
Sigma Level	1			5	512.4	4.2
Absolute Errs	TRUE			6	513.7	4.36
Symbol Type	1			7	512.2	6.03
Inverse Plot	FALSE			8	514.2	5.23
Color Plot	TRUE			9	512	4.23
3D plot	FALSE			10	507.6	6.76
Linear	FALSE			11	514.2	5.97
Data Range	P5:Q26			12	514.2	4.89
Filled Symbols	FALSE			13	513.7	10.56
ConcAge	FALSE			14	511.7	7.2
ConcSwap	FALSE			15	512.1	5.09
1st Symbol-row	1			16	512	5.49
				17	509.7	4.33
				18	514.6	4.36
				19	514	4.42
				20	509.5	8.35
				21	513.9	4.22
				22	511.7	4.62
				IsoLine	IsoLine	IsoLine	IsoLine

## Sheet: PlotDat16
Source sheet	Sheet1	0.65909	0.08361	0.605627	0.0773023	0.621545	0.0789747	0.637621	0.0806498	0.653855	0.0823274	0.670251	0.0840077	0.68681	0.0856906	0.703532	0.087376	0.601509	0.077	0.602818	0.077	0.600208	0.077	0.588642	0.0756324	0.45	0.0839746	0.688496	0.0842852	0.633183	0.0838177	0.650624	0.0838082	0.629929	0.0836128	0.616516	0.0832698	0.633535	0.0835049	0.699228	0.0834664	0.674117	0.0836973	0.641642	0.0831996	0.701431	0.0827769	0.695245	0.0837783
Plot name	Concordia15	0.61617	0.08324	0.605576	0.0773318	0.621492	0.079005	0.637566	0.0806807	0.653799	0.082359	0.670194	0.08404	0.68675	0.0857235	0.703471	0.0874097	0.601509	0.077	0.605076	0.0772385	0.601509	0.0771382	0.604365	0.0773023	0.85	0.0816274	0.68809	0.0844681	0.632804	0.0840121	0.650235	0.0839972	0.629636	0.0837812	0.616175	0.0834515	0.633174	0.0836917	0.698791	0.0836739	0.673628	0.0838782	0.641277	0.0833812	0.700988	0.0829748	0.694703	0.0839839
Plot Type	1	0.62246	0.08311	0.605427	0.077359	0.621338	0.0790328	0.637408	0.0807091	0.653636	0.0823881	0.670025	0.0840696	0.686577	0.0857538	0.703293	0.0874405	0.605076	0.0773775	0.608651	0.0776154	0.605076	0.0775164	0.620244	0.0789747			0.686894	0.0846276	0.631699	0.0841728	0.649088	0.084162	0.628776	0.083928	0.615181	0.0836016	0.632119	0.083846	0.697504	0.0838549	0.672182	0.0840359	0.64021	0.0835314	0.699677	0.0831522	0.693102	0.0841631
1st free col	73	0.60884	0.08299	0.605192	0.0773816	0.621096	0.0790559	0.637158	0.0807327	0.653379	0.0824122	0.66976	0.0840942	0.686304	0.0857789	0.703012	0.0874662	0.608651	0.077755	0.612233	0.0779924	0.608651	0.0778947	0.636279	0.0806498			0.684939	0.0847593	0.629914	0.0842928	0.647215	0.0842982	0.627372	0.0840493	0.613577	0.0837136	0.630417	0.0839612	0.695402	0.0840044	0.669818	0.0841662	0.638488	0.0836435	0.697523	0.0833056	0.690483	0.0843112
Sigma Level	1	0.60123	0.08273	0.604889	0.0773978	0.620784	0.0790724	0.636837	0.0807496	0.653048	0.0824294	0.66942	0.0841119	0.685954	0.0857969	0.702651	0.0874846	0.612233	0.0781328	0.615824	0.0783695	0.612233	0.0782731	0.652474	0.0823274			0.682279	0.0848597	0.627529	0.0843667	0.644667	0.0844019	0.625462	0.0841417	0.611434	0.0837826	0.628143	0.0840322	0.692541	0.0841182	0.6666	0.0842655	0.636186	0.0837125	0.694567	0.0834321	0.68692	0.084424
Absolute Errs	TRUE	0.61731	0.08295	0.604545	0.0774062	0.620429	0.079081	0.63647	0.0807584	0.652671	0.0824384	0.669031	0.084121	0.685554	0.0858063	0.70224	0.0874941	0.615824	0.0785106	0.619423	0.0787468	0.615824	0.0786517	0.668829	0.0840077			0.678986	0.084926	0.624647	0.0843914	0.641513	0.0844704	0.6231	0.0842026	0.608845	0.0838056	0.625394	0.0840559	0.689001	0.0841934	0.662617	0.0843311	0.633405	0.0837356	0.690868	0.0835291	0.68251	0.0844985
Symbol Type	1	0.66761	0.0827	0.604185	0.0774062	0.620058	0.079081	0.636089	0.0807584	0.652277	0.0824384	0.668626	0.084121	0.685137	0.0858063	0.701811	0.0874941	0.619423	0.0788886	0.623029	0.0791242	0.619423	0.0790303	0.685345	0.0856906			0.675151	0.0849564	0.621395	0.0843658	0.637839	0.0845018	0.620348	0.0842305	0.605922	0.0837817	0.622293	0.0840313	0.684876	0.0842279	0.657976	0.0843612	0.630266	0.0837117	0.686497	0.0835947	0.677371	0.0845327
Inverse Plot	FALSE	0.63853	0.08303	0.603841	0.0773978	0.619703	0.0790724	0.635722	0.0807496	0.6519	0.0824294	0.668238	0.0841119	0.684737	0.0857969	0.7014	0.0874846	0.623029	0.0792667	0.626644	0.0795018	0.623029	0.0794092	0.702025	0.087376			0.670878	0.08495	0.617915	0.0842909	0.633746	0.0844952	0.617282	0.0842245	0.602795	0.0837117	0.618973	0.0839594	0.680281	0.0842207	0.652805	0.084355	0.626906	0.0836418	0.68154	0.0836278	0.671646	0.0845257
Color Plot	TRUE	0.62522	0.08266	0.603538	0.0773816	0.619391	0.0790559	0.635401	0.0807327	0.651569	0.0824122	0.667897	0.0840942	0.684386	0.0857789	0.701039	0.0874662	0.626644	0.0796449	0.630267	0.0798795	0.626644	0.0797881	IsoLine	IsoLine			0.666283	0.0849071	0.614358	0.0841701	0.629345	0.0844508	0.613986	0.0841849	0.599599	0.0835989	0.615581	0.0838434	0.675341	0.084172	0.647245	0.0843127	0.623473	0.083529	0.676092	0.0836277	0.665489	0.0844776
3D plot	FALSE	0.65636	0.08192	0.603303	0.077359	0.619149	0.0790328	0.635151	0.0807091	0.651312	0.0823881	0.667632	0.0840696	0.684114	0.0857538	0.700758	0.0874405	0.630267	0.0800233	0.633897	0.0802573	0.630267	0.0801672					0.661492	0.0848289	0.61088	0.0840087	0.624756	0.0843698	0.61055	0.0841127	0.596475	0.083448	0.612265	0.0836884	0.670189	0.0840831	0.641447	0.0842353	0.620116	0.0833783	0.670261	0.0835943	0.659069	0.0843897
Linear	FALSE	0.65584	0.08302	0.603154	0.0773318	0.618995	0.079005	0.634993	0.0806807	0.651148	0.082359	0.667464	0.08404	0.68394	0.0857235	0.70058	0.0874097	0.633897	0.0804018	0.637536	0.0806352	0.633897	0.0805464					0.656635	0.0847173	0.607634	0.0838137	0.620104	0.0842545	0.607067	0.0840098	0.593558	0.0832658	0.609169	0.083501	0.664967	0.0839565	0.63557	0.0841251	0.616982	0.0831961	0.664159	0.0835283	0.652561	0.0842644
Data Range	H5:K26	0.62959	0.08304	0.603103	0.0773023	0.618942	0.0789747	0.634938	0.0806498	0.651092	0.0823274	0.667406	0.0840077	0.683881	0.0856906	0.700519	0.087376	0.637536	0.0807805	0.641183	0.0810133	0.637536	0.0809258					0.651845	0.0845756	0.604761	0.0835936	0.615517	0.084108	0.603632	0.0838791	0.590977	0.0830602	0.606429	0.0832896	0.659817	0.0837957	0.629773	0.083985	0.614209	0.0829905	0.657905	0.083431	0.646142	0.0841052
Filled Symbols	FALSE	0.62594	0.08295	0.603154	0.0772727	0.618995	0.0789445	0.634993	0.0806188	0.651148	0.0822958	0.667464	0.0839754	0.68394	0.0856576	0.70058	0.0873424	0.641183	0.0811593	0.644838	0.0813915	0.641183	0.0813053					0.647253	0.0844075	0.602386	0.0833581	0.611119	0.0839343	0.60034	0.0837242	0.588844	0.0828401	0.604164	0.0830634	0.65488	0.0836049	0.624215	0.0838189	0.611916	0.0827704	0.651621	0.0833044	0.639988	0.0839164
ConcAge	FALSE	0.65051	0.08261	0.603303	0.0772455	0.619149	0.0789166	0.635151	0.0805904	0.651312	0.0822668	0.667632	0.0839458	0.684114	0.0856274	0.700758	0.0873116	0.644838	0.0815382	0.648502	0.0817698	0.644838	0.0816849					0.642984	0.0842177	0.600614	0.0831174	0.607031	0.083738	0.597279	0.0835493	0.587252	0.0826153	0.602474	0.0828322	0.65029	0.0833895	0.619048	0.0836313	0.610205	0.0825456	0.645429	0.0831507	0.634266	0.0837032
ConcSwap	FALSE	0.65178	0.08268	0.603538	0.0772229	0.619391	0.0788935	0.635401	0.0805668	0.651569	0.0822427	0.667897	0.0839212	0.684386	0.0856022	0.701039	0.0872859	0.648502	0.0819172	0.652173	0.0821483	0.648502	0.0820646					0.639154	0.0840113	0.599521	0.082882	0.603363	0.0835247	0.594534	0.0833591	0.586271	0.0823954	0.601432	0.0826061	0.646172	0.0831553	0.614412	0.0834272	0.60915	0.0823257	0.63945	0.0829731	0.629133	0.0834713
1st Symbol-row	1	0.65457	0.08267	0.603841	0.0772067	0.619703	0.078877	0.635722	0.0805499	0.6519	0.0822254	0.668238	0.0839035	0.684737	0.0855842	0.7014	0.0872675	0.652173	0.0822964	0.655853	0.0825269	0.652173	0.0824445					0.635868	0.083794	0.599157	0.0826623	0.600217	0.0833	0.592179	0.0831588	0.585944	0.0821902	0.601085	0.0823951	0.642639	0.0829086	0.610434	0.0832123	0.608798	0.0821204	0.6338	0.082775	0.624729	0.0832271
		0.65649	0.08229	0.604185	0.0771983	0.620058	0.0788684	0.636089	0.0805411	0.652277	0.0822164	0.668626	0.0838944	0.685137	0.0855749	0.701811	0.087258	0.655853	0.0826757	0.65954	0.0829056	0.655853	0.0828245					0.633216	0.0835716	0.599536	0.0824679	0.597677	0.0830701	0.590278	0.0829539	0.586285	0.0820085	0.601446	0.0822083	0.639788	0.0826563	0.607222	0.0829925	0.609163	0.0819388	0.628589	0.0825603	0.621173	0.0829773
		0.65163	0.0831	0.604545	0.0771983	0.620429	0.0788684	0.63647	0.0805411	0.652671	0.0822164	0.669031	0.0838944	0.685554	0.0855749	0.70224	0.087258	0.65954	0.0830551	0.663236	0.0832845	0.65954	0.0832047					0.631269	0.0833503	0.600641	0.0823072	0.595813	0.0828413	0.588884	0.08275	0.587279	0.0818584	0.602501	0.082054	0.637695	0.0824051	0.604864	0.0827736	0.61023	0.0817886	0.623919	0.0823331	0.618562	0.0827286
		0.65444	0.08301	0.604889	0.0772067	0.620784	0.078877	0.636837	0.0805499	0.653048	0.0822254	0.66942	0.0839035	0.685954	0.0855842	0.702651	0.0872675	0.663236	0.0834347	0.666941	0.0836635	0.663236	0.083585					0.630081	0.0831361	0.602426	0.0821872	0.594676	0.0826199	0.588034	0.0825527	0.588883	0.0817464	0.604203	0.0819388	0.636418	0.082162	0.603425	0.0825618	0.611952	0.0816765	0.61988	0.0820979	0.616968	0.0824879
		0.66119	0.08225	0.605192	0.0772229	0.621096	0.0788935	0.637158	0.0805668	0.653379	0.0822427	0.66976	0.0839212	0.686304	0.0856022	0.703012	0.0872859	0.666941	0.0838144	0.670653	0.0840426	0.666941	0.0839654					0.629684	0.0829348	0.604811	0.0821133	0.594296	0.0824118	0.587751	0.0823672	0.591026	0.0816774	0.606477	0.0818678	0.635992	0.0819336	0.602943	0.0823627	0.614254	0.0816075	0.616552	0.0818592	0.616435	0.0822617
		0.66599	0.08298	0.605427	0.0772455	0.621338	0.0789166	0.637408	0.0805904	0.653636	0.0822668	0.670025	0.0839458	0.686577	0.0856274	0.703293	0.0873116	0.670653	0.0841943	0.674374	0.0844219	0.670653	0.0843459					0.63009	0.0827519	0.607693	0.0820886	0.594685	0.0822228	0.588044	0.0821988	0.593615	0.0816544	0.609226	0.0818441	0.636429	0.0817261	0.603432	0.0821818	0.617035	0.0815844	0.613998	0.0816217	0.616977	0.0820561
		0.65911	0.08261	0.605576	0.0772727	0.621492	0.0789445	0.637566	0.0806188	0.653799	0.0822958	0.670194	0.0839754	0.68675	0.0856576	0.703471	0.0873424	0.674374	0.0845742	0.678103	0.0848013	0.674374	0.0847266					0.631286	0.0825924	0.610945	0.0821142	0.595832	0.082058	0.588904	0.082052	0.596538	0.0816783	0.612327	0.0818687	0.637716	0.0815451	0.604878	0.0820241	0.620174	0.0816083	0.612268	0.08139	0.618578	0.0818769
		IsoLine	IsoLine	0.605627	0.0773023	0.621545	0.0789747	0.637621	0.0806498	0.653855	0.0823274	0.670251	0.0840077	0.68681	0.0856906	0.703532	0.087376	0.678103	0.0849543	0.68184	0.0851808	0.678103	0.0851074					0.633241	0.0824607	0.614425	0.0821891	0.597705	0.0819218	0.590308	0.0819307	0.599665	0.0817483	0.615647	0.0819406	0.639818	0.0813956	0.607242	0.0818938	0.623534	0.0816782	0.611397	0.0811686	0.621197	0.0817288
				ConcTikEll	ConcTikEll	ConcTikEll	ConcTikEll	ConcTikEll	ConcTikEll	ConcTikEll	ConcTikEll	ConcTikEll	ConcTikEll	ConcTikEll	ConcTikEll	ConcTikEll	ConcTikEll	0.68184	0.0853346	0.685586	0.0855604	0.68184	0.0854884					0.635901	0.0823603	0.617982	0.0823099	0.600253	0.0818181	0.592218	0.0818383	0.602861	0.0818611	0.619039	0.0820566	0.642679	0.0812818	0.61046	0.0817945	0.626967	0.081791	0.611401	0.0809618	0.62476	0.081616
																		0.685586	0.085715	0.68934	0.0859402	0.685586	0.0858695					0.639194	0.082294	0.62146	0.0824713	0.603407	0.0817496	0.59458	0.0817774	0.605985	0.082012	0.622355	0.0822116	0.646219	0.0812066	0.614443	0.0817289	0.630324	0.0819417	0.61228	0.0807737	0.62917	0.0815415
																		0.68934	0.0860955	0.693102	0.0863202	0.68934	0.0862507					0.643029	0.0822636	0.624706	0.0826663	0.607081	0.0817182	0.597332	0.0817495	0.608902	0.0821942	0.625451	0.082399	0.650344	0.0811721	0.619084	0.0816988	0.633458	0.0821239	0.614017	0.0806079	0.634309	0.0815073
																		0.693102	0.0864761	0.696873	0.0867002	0.693102	0.086632					0.647302	0.08227	0.627579	0.0828864	0.611174	0.0817248	0.600398	0.0817555	0.611483	0.0823998	0.628191	0.0826104	0.654939	0.0811793	0.624255	0.081705	0.636231	0.0823295	0.616578	0.0804676	0.640034	0.0815143
																		0.696873	0.0868569	0.700652	0.0870804	0.696873	0.0870135					0.651897	0.0823129	0.629954	0.0831219	0.615575	0.0817692	0.603694	0.0817951	0.613616	0.0826199	0.630456	0.0828366	0.659879	0.081228	0.629815	0.0817473	0.638524	0.0825496	0.619913	0.0803556	0.646191	0.0815624
																		0.700652	0.0872378	0.704439	0.0874607	0.700652	0.0873951					0.656688	0.0823911	0.631726	0.0833626	0.620164	0.0818502	0.60713	0.0818673	0.615208	0.0828447	0.632146	0.0830678	0.665031	0.0813169	0.635613	0.0818247	0.640235	0.0827744	0.623958	0.0802741	0.652611	0.0816503
																		0.704439	0.0876188	0.708235	0.0878412	0.704439	0.0877769					0.661545	0.0825027	0.632819	0.083598	0.624816	0.0819655	0.610613	0.0819702	0.616189	0.0830646	0.633188	0.0832939	0.670253	0.0814435	0.64149	0.0819349	0.64129	0.0829943	0.628634	0.0802246	0.659119	0.0817756
																		0.708235	0.088	0.709823	0.088	0.706657	0.088					0.666335	0.0826444	0.633183	0.0838177	0.629403	0.082112	0.614048	0.0821009	0.616516	0.0832698	0.633535	0.0835049	0.675403	0.0816043	0.647287	0.082075	0.641642	0.0831996	0.633849	0.0802081	0.665538	0.0819348
																		0.708235	0.088	ConcBand	ConcBand	ConcBand	ConcBand					0.670927	0.0828125			0.633801	0.0822857	0.61734	0.0822558					0.68034	0.0817951	0.652845	0.0822411			0.639502	0.0802249	0.671692	0.0821236
																		IsoLine	IsoLine									0.675196	0.0830023			0.637889	0.082482	0.620401	0.0824307					0.68493	0.0820105	0.658012	0.0824287			0.645484	0.0802747	0.677414	0.0823368
																												0.679026	0.0832087			0.641557	0.0826953	0.623146	0.0826209					0.689048	0.0822447	0.662648	0.0826328			0.651677	0.0803565	0.682547	0.0825687
																												0.682312	0.083426			0.644703	0.08292	0.625501	0.0828212					0.692581	0.0824914	0.666626	0.0828477			0.657961	0.0804688	0.686951	0.0828129
																												0.684964	0.0836484			0.647243	0.0831499	0.627402	0.0830261					0.695432	0.0827437	0.669838	0.0830675			0.664214	0.0806093	0.690507	0.0830627
																												0.686911	0.0838697			0.649107	0.0833787	0.628796	0.08323					0.697525	0.0829949	0.672196	0.0832864			0.670314	0.0807753	0.693118	0.0833114
																												0.688099	0.0840839			0.650244	0.0836001	0.629646	0.0834273					0.698802	0.083238	0.673635	0.0834982			0.676143	0.0809636	0.694712	0.0835521
																												0.688496	0.0842852			0.650624	0.0838082	0.629929	0.0836128					0.699228	0.0834664	0.674117	0.0836973			0.681587	0.0811705	0.695245	0.0837783
																																														0.686539	0.081392
																																														0.690904	0.0816238
																																														0.694597	0.0818613
																																														0.697546	0.0821
																																														0.699693	0.0823352
																																														0.700996	0.0825623
																																														0.701431	0.0827769
[truncated: 22 more columns]

## Sheet: PlotDat17
Source sheet	Sheet1	0.3	532.753	1	534.3	9.88
Plot name	Average16	25.7	532.753	2	528.5	10.25
Plot Type	15			3	539.3	9.42
1st free col	8			4	532.5	9.69
Sigma Level	1			5	527.4	8.92
Absolute Errs	TRUE			6	533.2	8.88
Symbol Type	1			7	533.1	9.46
Inverse Plot	FALSE			8	536.4	8.41
Color Plot	TRUE			9	532.6	8.93
3D plot	FALSE			10	534.3	8.91
Linear	FALSE			11	532	8.87
Data Range	P28:Q52			12	534.2	9.47
Filled Symbols	FALSE			13	531.7	8.55
ConcAge	FALSE			14	531.1	8.57
ConcSwap	FALSE			15	530.1	9.03
1st Symbol-row	1			16	534.3	9.32
				17	533.5	8.37
				18	532.1	8.17
				19	527	13.53
				20	529	10.02
				21	530.3	8.4
				22	534.6	8.59
				23	537.7	8.45
				24	532.7	8.55
				25	532.5	8.37
				IsoLine	IsoLine	IsoLine	IsoLine

## Sheet: PlotDat18
Source sheet	Sheet1	0.3	532.858	1	534.3	9.88
Plot name	Average17	24.7	532.858	2	528.5	10.25
Plot Type	15			3	539.3	9.42
1st free col	8			4	532.5	9.69
Sigma Level	1			5	527.4	8.92
Absolute Errs	TRUE			6	533.2	8.88
Symbol Type	1			7	533.1	9.46
Inverse Plot	FALSE			8	536.4	8.41
Color Plot	TRUE			9	532.6	8.93
3D plot	FALSE			10	534.3	8.91
Linear	FALSE			11	532	8.87
Data Range	P28:Q52			12	534.2	9.47
Filled Symbols	FALSE			13	531.7	8.55
ConcAge	FALSE			14	531.1	8.57
ConcSwap	FALSE			15	530.1	9.03
1st Symbol-row	1			16	534.3	9.32
				17	533.5	8.37
				18	532.1	8.17
				19	529	10.02
				20	530.3	8.4
				21	534.6	8.59
				22	537.7	8.45
				23	532.7	8.55
				24	532.5	8.37
				IsoLine	IsoLine	IsoLine	IsoLine

[truncated: 4 more sheets: PlotDat19, PlotDat20, PlotDat21, Sheet1]
