# Supplementary material
Source: publisher figshare collection journal article supplement (https://gsapubs.figshare.com/articles/dataset/_/12542612)
Supplement: Supplementary file 1 [file 1]

Jiyuan Yin, Wenjiao Xiao, Min Sun, Wen Chen, Chao Yuan, Yunying Zhang, Tao Wang, Qiuyi Du, Xiangsong Wang, and Xiaoping Xia, 2020, Petrogenesis of Early Cambrian granitoids in the western Kunlun orogenic belt, Northwest Tibet: Insight into early stage subduction of the Proto-Tethys Ocean: GSA Bulletin, <https://doi.org/10.1130/B35408.1>.

## Data Repository

### Appendix 1. Analytical\_methods

**Table DR1.** LA-ICP–MS zircon U-Pb isotopic analysis of the granitic batholiths in the WKOB.

**Table DR2.** Whole-rock major (wt.%) and trace (ppm) elements of the granitic batholiths in the WKOB.

**Table DR3.** Whole-rock Sr-Nd isotopic compositions of the granitic batholiths in the WKOB.

**Table DR4.** Zircon Lu-Hf isotopic compositions of zircons from the granitic batholiths in the WKOB.

**Table DR5.** Zircon O-isotope compositions of the granitic batholiths in the WKOB.

# Supplementary File 1 Analytical methods

## Zircon U–Pb dating

*Zircon U–Pb dating* was carried out at the MC–ICPMS (Inductively Coupled Plasma Mass Spectrometry) laboratory of the Institute of Geology and Geophysics, Chinese Academy of Sciences (IGG CAS) in Beijing. Detailed operating conditions for the laser ablation system and the ICP–MS instrument and data reduction were the same as described by Xie et al. (2008). An Agilent 7500a quadrupole (Q)–ICPMS and a Neptune multi–collector (MC)–ICPMS with a 193 nm excimer ArF laser–ablation system (GeoLas Plus) attached were used for simultaneous determination of zircon U–Pb ages. Helium carrier gas transported the ablated sample materials from the laser-ablation cell via a mixing chamber to the ICPMS. Every spot analysis consisted of ~30 s background acquisition and 40 s sample data acquisition.  $^{207}\text{Pb}/^{206}\text{Pb}$ ,  $^{206}\text{Pb}/^{238}\text{U}$ ,  $^{207}\text{U}/^{235}\text{U}$  ( $^{235}\text{U} = ^{238}\text{U}/137.88$ ),  $^{208}\text{Pb}/^{232}\text{Th}$  ratios were corrected by using zircon 91500 as external standard. The weighted mean U–Pb ages and concordia plots were processed using ISOPLOT 3.0 (Ludwig, 2003).

## Zircon Lu–Hf isotope analyses

In situ Hf isotope measurements were subsequently undertaken using Laser Ablation (LA)–ICPMS with a beam size of 60  $\mu\text{m}$  and laser pulse frequency of 8 Hz with age determinations at the MC–ICPMS laboratory of IGG CAS. Details of instrumental conditions and data acquisition were given in Wu et al. (2006). The isobaric interference of  $^{176}\text{Lu}$  on  $^{176}\text{Hf}$  is negligible due to the extremely low  $^{176}\text{Lu}/^{177}\text{Hf}$  in zircon (normally  $< 0.002$ ). During the analyses for this study, GJ–1 as an unknown sample yielded a weighted  $^{206}\text{Pb}/^{238}\text{U}$  age of  $609.7 \pm 6.3$  Ma ( $2\sigma_n$ , MSWD = 0.97,  $n = 12$ ) and a weighted  $^{176}\text{Hf}/^{177}\text{Hf}$  ratio of  $0.282015 \pm 0.000003$  ( $2\sigma_n$ , MSWD = 1.12,  $n = 94$ ), which is in good agreement with the recommended U–Pb age and Hf isotopic ratio (Black et al., 2003; Wu et al., 2006). During data acquisition of Hf isotopes,  $^{176}\text{Hf}/^{177}\text{Hf}$  ratios of the zircon standard (MUD) were  $0.282504 \pm 0.000003$  ( $2\sigma_n$ , MSWD = 0.71,  $n = 82$ ).

Initial  $^{176}\text{Hf}/^{177}\text{Hf}$  ratios and  $\varepsilon_{\text{Hf}}(t)$  values were calculated with reference to the chondritic reservoir (CHUR) at the time of zircon growth in the magmas. The  $^{176}\text{Lu}$  decay constant of  $1.867 \times 10^{-11} \text{ year}^{-1}$  (Söderlund et al., 2004), the chondritic  $^{176}\text{Hf}/^{177}\text{Hf}$  ratio of 0.282785 and  $^{176}\text{Lu}/^{177}\text{Hf}$  ratio of 0.0336 (Bouvier et al., 2008) were adopted. Depleted mantle model ages ( $T_{\text{DM}}$ ) used for mafic to intermediate rocks were calculated with reference to the depleted mantle at a present–day  $^{176}\text{Hf}/^{177}\text{Hf}$  ratio of 0.28325, similar to that of the average MORB (Nowell et al., 1998) and  $^{176}\text{Lu}/^{177}\text{Hf} = 0.0384$  (Griffin et al., 2000).

## Zircon oxygen isotope analyses

Measurements of zircon O isotopes were conducted using the Cameca IMS 1280HR large-radius SIMS (Secondary Ion Mass Spectroscopy) at the State Key Laboratory of Isotope Geochemistry (SKLaBIG), Guangzhou Institute of Geochemistry, Chinese Academy of Sciences (GIG CAS). Analytical procedures are the same as those described by Li et al. (2010a). The  $\text{Cs}^+$  primary ion beam was accelerated at 10 kV, with an intensity of ca. 2 nA (Gaussian mode with a primary beam aperture of 200  $\mu\text{m}$  to reduce aberrations) and rastered over a 10  $\mu\text{m}$  area. The spot is  $\sim 20 \mu\text{m}$  in diameter (10  $\mu\text{m}$  beam diameter + 10  $\mu\text{m}$  raster).

A normal-incidence electron flood gun was used to compensate for sample charging during analysis with homogeneous electron density over a 100  $\mu\text{m}$  oval area. Negative secondary ions were extracted with a  $-10 \text{ kV}$  potential. The field aperture was set to 5000  $\mu\text{m}$ , and the transfer-optics magnification was adjusted to give a field of view of 125  $\mu\text{m}$  (FA = 8000). A 30 eV energy slit width was used, and its mechanical positions were controlled before starting the analysis (5 eV gap,  $-500$  digits with respect to the maximum). The entrance slit width was  $\sim 120 \mu\text{m}$ , and the exit slit width was 500 microns for multicollector Faraday cups (FCs) for  $^{16}\text{O}$  and  $^{18}\text{O}$  is 500  $\mu\text{m}$  (MRP = 2500). The intensity of  $^{16}\text{O}$  was typically  $1 \times 10^9$  cps. Oxygen isotopes were measured in multi-collector mode using two off-axis Faraday cups. The NMR (Nuclear Magnetic Resonance) probe was used for magnetic field control with stability better than 2.5 ppm over 16 h on mass 17. One analysis takes  $\sim 4$  min, consisting of pre-sputtering ( $\sim 120$  s), automatic beam centering ( $\sim 60$  s) and integration of oxygen isotopes (10 cycles  $\times$  4 s, total 40 s). Uncertainties on individual analyses are reported at a  $2\sigma$  level. With low noise on the two FC amplifiers, the internal precision of a single analysis is generally better than 0.3‰ ( $2\sigma$ ) for  $^{18}\text{O}/^{16}\text{O}$  ratio. Values of  $\delta^{18}\text{O}$  are standardized to Vienna Standard Mean Ocean Water compositions (VSMOW) and reported in standard per mil notation.

The instrumental mass fractionation factor (IMF) is corrected using the 91500 zircon standard with  $(\delta^{18}\text{O})_{\text{VSMOW}} = 9.9 \text{‰}$  (Wiedenbeck et al., 2004). Measured  $^{18}\text{O}/^{16}\text{O}$  is normalized using VSMOW, then corrected for the instrumental mass fractionation factor (IMF) as follows:

$$(\delta^{18}\text{O})_{\text{M}} = ((^{18}\text{O}/^{16}\text{O})_{\text{M}} / 0.0020052 - 1) \times 1000 (\text{‰})$$

$$\text{IMF} = (\delta^{18}\text{O})_{\text{M}}(\text{standard}) - (\delta^{18}\text{O})_{\text{VSMOW}}$$

$$\delta^{18}\text{O}_{\text{sample}} = (\delta^{18}\text{O})_{\text{M}} + \text{IMF}$$

Seventeen measurements of the PengLai zircon standard during the course of this study yielded a weighted mean of  $\delta^{18}\text{O} = +5.29 \pm 0.07 \text{‰}$ , which is identical within errors to the reported value of  $5.31 \pm 0.10 \text{‰}$  (Li et al., 2010b).

## Major and trace element analyses

Rock samples examined by optical microscopy and selected whole-rock samples were sawed into small chips and ultrasonically cleaned in distilled water with  $< 3\%$   $\text{HNO}_3$  and then in distilled water alone and subsequently dried and handpicked to remove visible contamination. The

rocks were crushed and ground in a tungsten carbide ring mill, and the resulting powder was used for analyses of major and trace elements, and Sr–Nd isotopes. Major–element oxides were analyzed using a Rigaku RIX 2000 X–ray fluorescence spectrometer at SKLaBIG, GIG CAS on fused glass beads. Calibration lines used in quantification were produced by bivariate regression of data from 36 reference materials encompassing a wide range of silicate compositions (Li et al., 2005), and analytical uncertainties are between 1% and 5%.

Trace element concentrations, including rare earth element (REE) concentrations, were determined with a Perkin–Elmer ELAN–DRC–e inductively–coupled plasma mass spectrometer (ICP–MS) at the State Key Laboratory of Ore Deposit Geochemistry (SKLOG), Institute of Geochemistry, Chinese Academy of Sciences (IGCAS), with analytical uncertainty better than 10%. Samples were digested with 1 mL of HF and 0.5 mL of HNO<sub>3</sub> in screw top PTFE-lined stainless steel bombs at 190 °C for 12 h. The analytical precision is generally better than 1% for elements with concentrations >200 ppm, and 1%–3% when less than 200 ppm. The procedure for the trace elements is described in detail by Qi et al. (2000).

### **Sr–Nd isotope analyses**

Sr and Nd isotopic compositions of selected samples were determined using a MC–ICP–MS at SKLaBIG GIG CAS. Analytical procedures are similar to those described in Wei et al. (2002) and Li et al. (2004). The <sup>87</sup>Sr/<sup>86</sup>Sr ratio of the NBS987 standard and <sup>143</sup>Nd/<sup>144</sup>Nd ratio of the Shin Etsu JNdi–1 standard measured were  $0.710285 \pm 15$  (2 $\sigma$ ) and  $0.512085 \pm 10$  (2 $\sigma$ ), respectively. All measured <sup>143</sup>Nd/<sup>144</sup>Nd and <sup>86</sup>Sr/<sup>88</sup>Sr ratios were corrected for fractionation using ratios of <sup>146</sup>Nd/<sup>144</sup>Nd = 0.7219 and <sup>86</sup>Sr/<sup>88</sup>Sr = 0.1194, respectively.

### **REFERENCES CITED**

- Black, L.P., Kamo, S.L., Allen, C.M., Aleinikoff, J.N., Davis, D.W., Korsch, R.J., and Foudoulis, C., 2003, TEMORA 1: a new zircon standard for Phanerozoic U–Pb geochronology: *Chemical Geology*, v. 200, p. 155–170,, [https://doi.org/10.1016/S0009-2541\(03\)00165-7](https://doi.org/10.1016/S0009-2541(03)00165-7).
- Bouvier, A., Vervoort, J.D., and Patchett, P.J., 2008, The Lu–Hf and Sm–Nd isotopic composition of CHUR: constraints from unequilibrated chondrites and implications for the bulk composition of terrestrial planets: *Earth and Planetary Science Letters*, v. 273, p. 48–57, <https://doi.org/10.1016/j.epsl.2008.06.010>.
- Griffin, W.L., Pearson, N.J., Belousova, S., Jackson, S.E., Van Achterbergh, E., O'Reilly, S.Y., and Shee, S.Y., 2000, The Hf isotope composition of cratonic mantle: LAM–MC–ICPMS analysis of zircon megacrysts in kimberlites: *Geochimica et Cosmochimica Acta*, v. 64, p. 133–147, [https://doi.org/10.1016/S0016-7037\(99\)00343-9](https://doi.org/10.1016/S0016-7037(99)00343-9).
- Li, X.H., Long, W.G., Li, Q.L., Liu, Y., Zheng, Y.F., Yang, Y.H., Chamberlain, K.R., Wan, D.F., Guo, C.F., and Wang, X.C., 2010b, Penglai zircon megacrysts: a potential new working reference material for microbeam determination of Hf–O isotopes and U–Pb age:

- Geostandards and Geoanalytical Research, v. 34, p. 117–134,,  
<https://doi.org/10.1111/j.1751-908X.2010.00036.x>.
- Li, X.H., Liu, D.Y., Sun, M., Li, W.X., Liang, X.R., and Liu, Y., 2004, Precise Sm–Nd and U–Pb isotopic dating of the supergiant Shizhuyuan polymetallic deposit and its host granite, SE China: Geological Magazine, v. 141, p. 225–231,  
<https://doi.org/10.1017/S0016756803008823>.
- Li, X.H., Li, W.X., Li, Q.L., Wang, X.C., Liu, Y., and Yang, Y.H., 2010a, Petrogenesis and tectonic significance of the 850 Ma Gangbian alkaline complex in South China: Evidence from in situ zircon U–Pb dating, Hf–O isotopes and whole-rock geochemistry: Lithos, v. 114, p. 1–15,, <https://doi.org/10.1016/j.lithos.2009.07.011>.
- Li, X.H., Qi, C.S., Liu, Y., Liang, X.R., Tu, X.L., Xie, L.W., and Yang, Y.H., 2005, Petrogenesis of the Neoproterozoic bimodal volcanic rocks along the western margin of the Yangtze Block: new constraints from Hf isotopes and Fe/Mn ratios: Chinese Science Bulletin, v. 50, p. 2481–2486,, <https://doi.org/10.1360/982005-287>.
- Ludwig, K.R., 2003, User's manual for Isoplot 3.00: a geochronological toolkit for Microsoft Excel, Kenneth R. Ludwig.
- Nowell, G.M., Kempton, P.D., Noble, S.R., Fitton, J.G., Saunders, A.D., Mahoney, J.J., and Taylor, R.N., 1998, High precision Hf isotope measurements of MORB and OIB by thermal ionisation mass spectrometry: insights into the depleted mantle: Chemical Geology, v. 149, p. 211–233,, [https://doi.org/10.1016/S0009-2541\(98\)00036-9](https://doi.org/10.1016/S0009-2541(98)00036-9).
- Söderlund, U., Patchett, P.J., Vervoort, J.D., and Isachsen, C.E., 2004, The  $^{176}\text{Lu}$  decay constant determined by Lu–Hf and U–Pb isotope systematics of Precambrian mafic intrusions: Earth and Planetary Science Letters, v. 219, p. 311–324,,  
[https://doi.org/10.1016/S0012-821X\(04\)00012-3](https://doi.org/10.1016/S0012-821X(04)00012-3).
- Wei, G.J., Liang, X.R., Li, X.H., and Liu, Y., 2002, Precise measurement of Sr isotopic compositions of liquid and solid base using (LP) MCICP-MS: Geochimica, v. 31, p. 295–305.
- Wu, F.Y., Yang, Y.H., Xie, L.W., Yang, J.H., and Xu, P., 2006, Hf isotopic compositions of the standard zircons and baddeleyites used in U–Pb geochronology: Chemical Geology, v. 234, p. 105–126,, <https://doi.org/10.1016/j.chemgeo.2006.05.003>.
- Wiedenbeck, M., Hanchar, J.M., Peck, W.H., Sylvester, P., Valley, J., Whitehouse, M., Kronz, A., Morishita, Y., Nasdala, L., and Fiebig, J., 2004, Further characterisation of the 91500 zircon crystal: Geostandards and Geoanalytical Research, v. 28, p. 9–39,,  
<https://doi.org/10.1111/j.1751-908X.2004.tb01041.x>.
- Xie, L.W., Zhang, Y.B., Zhang, H.H., Sun, J.F., and Wu, F.Y., 2008, In situ simultaneous determination of trace elements, U–Pb and Lu–Hf isotopes in zircon and baddeleyite: Chinese Science Bulletin, v. 53, p. 1565–1573.
- Qi, L., Hu, J., and Gregoire, D.C., 2000, Determination of trace elements in granites by inductively coupled plasma mass spectrometry: Talanta, v. 51, p. 507–513,  
[https://doi.org/10.1016/S0039-9140\(99\)00318-5](https://doi.org/10.1016/S0039-9140(99)00318-5).
